# Supplementary material for: The majority of genes in the pathogenic Neisseria species are present in non-pathogenic Neisseria lactamica, including those designated as 'virulence genes'
Source: PubMed Central journal article supplement (PMC1538595; doi:10.1186/1471-2164-7-128), 2006-05-30
Supplement: 1471-2164-7-128-S1.pdf [file 1471-2164-7-128-S1.pdf]

**Supplementary Table 1. Virulence-associated and predicted virulence-associated genes from the pathogenic *Neisseria* spp.<sup>a</sup>**

|                                              |
|----------------------------------------------|
| ABC transport (NMB1880) *                    |
| <b>adhesin (NMB0586) *</b>                   |
| <i>bcp</i> *                                 |
| <i>bfrA</i> *                                |
| <i>bfrB</i> *                                |
| <i>ctrA</i>                                  |
| <i>ctrB</i>                                  |
| <i>ctrC</i>                                  |
| <i>ctrD</i>                                  |
| <i>dca / pptA</i> *                          |
| <i>dsbA</i> *                                |
| <b>endonuclease (NMB0533) *</b>              |
| <i>envA</i> *                                |
| <i>fabZ</i> *                                |
| <i>fbpA</i> *                                |
| <i>fbpB</i> *                                |
| <i>frpA</i>                                  |
| <i>frpA</i> -related (NMB1407) *             |
| <i>frpC</i> *                                |
| <i>fur</i> *                                 |
| <i>hap</i> *                                 |
| <b><i>hecB</i> (hemolysin activation)</b>    |
| <b>hemagglutinin/hemolysin (NMB0493)</b>     |
| <b>hemagglutinin/hemolysin (NMB1214)</b>     |
| <b>hemagglutinin/hemolysin (NMB1768)</b>     |
| hemagglutinin/hemolysin (NMB0497 & NMB1779)  |
| <b><i>hemH</i> *</b>                         |
| hemolysin (NMB1646) *                        |
| hemolysin (NMB1738)                          |
| hemolysin activator (NMB0496 & NMB1780)      |
| <i>hmbR</i> *                                |
| <i>hsf</i>                                   |
| IgA protease *                               |
| <b>iron ABC transport system (NMB1989) *</b> |
| <b>iron ABC transport system (NMB1990) *</b> |
| <b>iron ABC transport system (NMB1991) *</b> |
| <i>kat</i> *                                 |
| <i>kdtA</i> *                                |
| <i>lbpA</i> *                                |
| <i>lbpB</i>                                  |
| <i>lgtA</i> *                                |
| <i>lgtB</i> *                                |
| <i>lgtC</i>                                  |
| <i>lgtD</i>                                  |
| <i>lgtE</i>                                  |
| <i>lgtF</i> *                                |

|                                                       |
|-------------------------------------------------------|
| <i>lgtG</i>                                           |
| <i>lipA</i>                                           |
| <i>lipB</i>                                           |
| <i>lpxA</i> *                                         |
| <i>lpxB</i> *                                         |
| <i>lpxD</i> *                                         |
| <b>macrophage infectivity potentiator (NMB0995) *</b> |
| <b>macrophage infectivity potentiator (NMB1567) *</b> |
| <i>mtrR</i> *                                         |
| <i>mtrC</i> *                                         |
| <i>mtrD</i> *                                         |
| <i>mtrE</i> *                                         |
| <i>nadA</i>                                           |
| <i>narE</i>                                           |
| <i>nlpD</i> *                                         |
| NMB0065                                               |
| <i>norZ</i> *                                         |
| <i>omp85</i> *                                        |
| <i>ompH</i> *                                         |
| <i>opa</i> *                                          |
| <i>opc</i>                                            |
| <b>outer membrane lipoprotein (NMB1946) *</b>         |
| <i>pglA / pgtA</i> *                                  |
| <i>pglB</i> *                                         |
| <i>pglC</i> *                                         |
| <i>pglD</i> *                                         |
| <i>pglE</i> *                                         |
| <i>pglF</i> *                                         |
| <i>pglG</i>                                           |
| <i>pglH</i>                                           |
| <i>pglI / wbpC</i> *                                  |
| <i>pgm</i> *                                          |
| <i>phoP / misR</i> *                                  |
| <i>phoQ / misS</i> *                                  |
| <i>pilC</i> *                                         |
| <i>pilD</i> *                                         |
| <i>pilE</i> *                                         |
| <i>pilF</i> *                                         |
| <i>pilG</i> *                                         |
| <i>pilT</i> *                                         |
| <i>pilV</i> *                                         |
| <i>porA</i> *                                         |
| <i>porB</i> *                                         |
| <b><i>prc</i> (peptidase) *</b>                       |
| <b>protease (NMB2127) *</b>                           |
| <i>rfaC</i> *                                         |
| <i>rfaD</i> *                                         |
| <i>rfaE</i> *                                         |

|                                                |
|------------------------------------------------|
| <i>rfaF</i> *                                  |
| <i>rfaK</i> *                                  |
| <i>rmpM</i> *                                  |
| <i>sacA</i>                                    |
| <i>sacB</i>                                    |
| <i>sacC</i>                                    |
| <i>sacD</i>                                    |
| secretion protein (NMB1737)                    |
| <i>siaA</i>                                    |
| <i>siaB</i>                                    |
| <i>siaC</i>                                    |
| <i>siaD</i> (serogroup B & C alleles)          |
| <b>sialyltransferase (NMB0922) *</b>           |
| <i>sodB</i> *                                  |
| <i>sodC</i>                                    |
| <i>ssa1</i> *                                  |
| <b><i>tbp1</i> (<i>tbpA</i>)</b>               |
| <b><i>tbp2</i> (<i>tbpB</i>)</b>               |
| TonB-dependent receptor (NMB0293)              |
| <b>TonB-dependent receptor (NMB1346) *</b>     |
| <b>TonB-dependent receptor (NMB1449)</b>       |
| <b>TonB-dependent receptor (NMB1829)</b>       |
| TonB-dependent receptor (NMB1882) *            |
| <b>toxin-activating (NMB1210)</b>              |
| <b>toxin-activating (NMB1763)</b>              |
| <b>transferrin binding protein (NMB2132) *</b> |
| <i>tspA</i> *                                  |
| <i>tspB</i> *                                  |
| <b>twitching motility protein (NMB0051) *</b>  |
| <i>vacJ</i> *                                  |
| <i>vapA</i> *                                  |
| <b>VapD-related (NMB1753)</b>                  |
| <i>virG</i> *                                  |

<sup>a</sup>Genes listed in bold face are those present in at least one of the strains of *N. lactamica* tested in this study.

\*Genes that are present in all of the four pathogenic *Neisseria* spp. genome sequences.
