# Supplementary material for: The majority of genes in the pathogenic Neisseria species are present in non-pathogenic Neisseria lactamica, including those designated as 'virulence genes'
Source: PubMed Central journal article supplement (PMC1538595; doi:10.1186/1471-2164-7-128), 2006-05-30
Supplement: 1471-2164-7-128-S2.pdf [file 1471-2164-7-128-S2.pdf]

**Supplementary Table 2.****Genes from the pathogenic *Neisseria* spp. present in one or more of 13 *N. lactamica* strains.**

| Gene <sup>a</sup> | Present <sup>b</sup> | Annotation <sup>c</sup>                                                          |
|-------------------|----------------------|----------------------------------------------------------------------------------|
| NMB0002           | 9                    | hypothetical protein                                                             |
| NMB0003           | 10                   | glutamyl-tRNA synthetase ( <i>gltX</i> )                                         |
| NMB0004           | 6                    | EpiH/GdmH-related protein                                                        |
| NMB0005           | 12                   | arsenate reductase ( <i>arsC</i> )                                               |
| NMB0006           | 9                    | thioredoxin-related protein                                                      |
| NMB0007           | 13                   | cell division ATP-binding protein FtsE ( <i>ftsE</i> )                           |
| NMB0008           | 10                   | cell division protein FtsX, putative                                             |
| NMB0009           | 10                   | BolA-YrbA family protein                                                         |
| NMB0010           | 9                    | phosphoglycerate kinase ( <i>pgk</i> )                                           |
| NMB0011           | 13                   | UDP-N-acetylglucosamine 1-carboxyvinyltransferase ( <i>murA</i> )                |
| NMB0012           | 13                   | conserved hypothetical protein                                                   |
| NMB0014           | 4                    | 3-deoxy-D-manno-octulosonic-acid transferase ( <i>kdtA</i> )                     |
| NMB0015           | 6                    | 6-phosphogluconate dehydrogenase, decarboxylating ( <i>gnd</i> )                 |
| NMB0017           | 13                   | UDP-3-O-3-hydroxymyristoyl N-acetylglucosamine deacetylase ( <i>envA</i> )       |
| NMB0018           | 12                   | Type IV pilin class I ( <i>pilE</i> )                                            |
| NMB0027           | 7                    | FKBP-type peptidyl-prolyl cis-trans isomerase                                    |
| NMB0028           | 13                   | hypothetical protein                                                             |
| NMB0029           | 13                   | glycerate dehydrogenase ( <i>hprA</i> )                                          |
| NMB0030           | 13                   | methionyl-tRNA synthetase ( <i>metG</i> )                                        |
| NMB0031           | 13                   | glucosamine--fructose-6-phosphate aminotransferase (isomerizing) ( <i>glmS</i> ) |
| NMB0032           | 13                   | hypothetical protein                                                             |
| NMB0033           | 12                   | membrane-bound lytic murein transglycosylase A, putative                         |
| NMB0034           | 4                    | conserved hypothetical protein                                                   |
| NMB0035           | 13                   | conserved hypothetical protein                                                   |
| NMB0036           | 10                   | conserved hypothetical protein                                                   |
| NMB0037           | 13                   | <i>phnA</i> protein ( <i>phnA</i> )                                              |
| NMB0038           | 4                    | UDP-N-acetylglucosamine pyrophosphorylase ( <i>glmU</i> )                        |
| NMB0039           | 13                   | hypothetical protein                                                             |
| NMB0041           | 13                   | ABC transporter, periplasmic solute-binding protein                              |
| NMB0042           | 10                   | conserved hypothetical protein                                                   |
| NMB0043           | 13                   | conserved hypothetical protein                                                   |
| NMB0044           | 13                   | peptide methionine sulfoxide reductase ( <i>pilB</i> )                           |
| NMB0045           | 13                   | signal recognition particle protein ( <i>pilA</i> )                              |
| NMB0047           | 13                   | conserved hypothetical protein                                                   |
| NMB0048           | 1                    | conserved hypothetical protein                                                   |
| NMB0050           | 12                   | conserved hypothetical protein                                                   |
| NMB0051           | 7                    | twitching motility protein                                                       |
| NMB0052           | 10                   | twitching motility protein PilT ( <i>pilT-1</i> )                                |
| NMB0053           | 5                    | conserved hypothetical protein                                                   |
| NMB0054           | 9                    | hypothetical protein                                                             |
| NMB0055           | 13                   | pyrroline-5-carboxylate reductase ( <i>proC</i> )                                |
| NMB0056           | 13                   | DnaK suppressor protein ( <i>dksA</i> )                                          |
| NMB0057           | 13                   | putative DNA transport competence protein                                        |
| NMB0058           | 13                   | hypothetical protein                                                             |
| NMB0059           | 10                   | <i>dnaJ</i> protein ( <i>dnaJ</i> )                                              |
| NMB0060           | 10                   | conserved hypothetical protein                                                   |
| NMB0061           | 9                    | dTDP-4-keto-6-deoxy-D-glucose-3,6-epimerase                                      |
| NMB0062           | 13                   | glucose-1-phosphate thymidyltransferase ( <i>rfaA-1</i> )                        |
| NMB0063           | 13                   | dTDP-D-glucose 4,6-dehydratase ( <i>rfaB</i> )                                   |
| NMB0064           | 9                    | UDP-glucose 4-epimerase ( <i>galE</i> )                                          |
| NMB0075           | 9                    | transcriptional accessory protein Tex, putative                                  |
| NMB0078           | 10                   | UDP-glucose 4-epimerase ( <i>galE</i> )                                          |
| NMB0079           | 13                   | dTDP-D-glucose 4,6-dehydratase ( <i>rfaB</i> )                                   |
| NMB0080           | 13                   | glucose-1-phosphate thymidyltransferase ( <i>rfaA-1</i> )                        |
| NMB0081           | 10                   | dTDP-4-keto-6-deoxy-D-glucose-3,6-epimerase                                      |
| NMB0082           | 4                    | capsule polysaccharide modification protein LipA                                 |
| NMB0085           | 10                   | sodium-glutamate symporter ( <i>gltS</i> )                                       |
| NMB0086           | 13                   | hypothetical protein                                                             |

|         |    |                                                             |
|---------|----|-------------------------------------------------------------|
| NMB0087 | 13 | hypothetical protein                                        |
| NMB0088 | 7  | outer membrane protein P1, putative                         |
| NMB0089 | 7  | pyruvate kinase II ( pykA )                                 |
| NMB0090 | 13 | IS1016 family transposase                                   |
| NMB0098 | 1  | ABC transporter, ATP-binding protein                        |
| NMB0101 | 13 | IS1016 family transposase                                   |
| NMB0102 | 12 | hypothetical protein                                        |
| NMB0103 | 8  | hypothetical protein                                        |
| NMB0104 | 5  | hypothetical protein                                        |
| NMB0105 | 6  | PhnO-related protein                                        |
| NMB0106 | 13 | aspartate carbamoyltransferase, catalytic subunit ( pyrB )  |
| NMB0107 | 13 | aspartate carbamoyltransferase, regulatory subunit ( pyrI ) |
| NMB0108 | 9  | hypothetical protein                                        |
| NMB0109 | 13 | conserved hypothetical protein                              |
| NMB0110 | 13 | polypeptide deformylase ( def )                             |
| NMB0111 | 12 | methionyl-tRNA formyltransferase ( fmt )                    |
| NMB0112 | 13 | 16S RNA methyltransferase ( rsmB )                          |
| NMB0113 | 9  | hypothetical protein                                        |
| NMB0114 | 10 | nitrogen regulation protein NtrY, putative                  |
| NMB0115 | 9  | nitrogen assimilation regulatory protein NtrX ( ntrX )      |
| NMB0116 | 7  | DNA processing chain A ( dprA ) [smf]                       |
| NMB0117 | 10 | smg protein, putative                                       |
| NMB0118 | 11 | DNA topoisomerase I ( topA )                                |
| NMB0121 | 10 | conserved hypothetical protein                              |
| NMB0122 | 11 | conserved hypothetical protein/ possible DNA methylase      |
| NMB0123 | 13 | ferredoxin, 4Fe-4S bacterial type                           |
| NMB0124 | 10 | translation elongation factor Tu ( tufA )                   |
| NMB0125 | 10 | preprotein translocase subunit SecE ( secE )                |
| NMB0126 | 11 | transcription antitermination protein NusG ( nusG )         |
| NMB0127 | 9  | 50S ribosomal protein L11 ( rplK )                          |
| NMB0128 | 13 | 50S ribosomal protein L1 ( rplA )                           |
| NMB0129 | 13 | hypothetical protein                                        |
| NMB0130 | 13 | 50S ribosomal protein L10 ( rplJ )                          |
| NMB0131 | 12 | 50S ribosomal protein L7-L12 ( rplL )                       |
| NMB0132 | 5  | DNA-directed RNA polymerase, beta subunit ( rpoB )          |
| NMB0133 | 7  | DNA-directed RNA polymerase, beta prime subunit ( rpoC )    |
| NMB0134 | 7  | hypothetical protein                                        |
| NMB0135 | 13 | conserved hypothetical protein                              |
| NMB0136 | 13 | 30S ribosomal protein S12 ( rpsL )                          |
| NMB0137 | 7  | 30S ribosomal protein S7 ( rpsG )                           |
| NMB0138 | 13 | elongation factor G (EF-G) ( fusA )                         |
| NMB0139 | 10 | translation elongation factor Tu ( tufA )                   |
| NMB0140 | 13 | 30S ribosomal protein S10 ( rpsJ )                          |
| NMB0141 | 9  | IS1106 related transposase                                  |
| NMB0142 | 13 | 50S ribosomal protein L3 ( rplC )                           |
| NMB0143 | 13 | 50S ribosomal protein L4 ( rplD )                           |
| NMB0144 | 13 | 50S ribosomal protein L23 ( rplW )                          |
| NMB0144 | 12 | 50S ribosomal protein L23 ( rplW )                          |
| NMB0145 | 6  | 50S ribosomal protein L2 ( rplB )                           |
| NMB0146 | 10 | 30S ribosomal protein S19 ( rpsS )                          |
| NMB0147 | 13 | 50S ribosomal protein L22 ( rplV )                          |
| NMB0148 | 13 | 30S ribosomal protein S3 ( rpsC )                           |
| NMB0149 | 13 | 50S ribosomal protein L16 ( rplP )                          |
| NMB0150 | 13 | 50S ribosomal protein L29 ( rpmC )                          |
| NMB0151 | 9  | 30S ribosomal protein S17 ( rpsQ )                          |
| NMB0152 | 12 | 50S ribosomal protein L14 ( rplN )                          |
| NMB0153 | 13 | 50S ribosomal protein L24 ( rplX )                          |
| NMB0154 | 12 | 50S ribosomal protein L5 ( rplE )                           |
| NMB0155 | 13 | 30S ribosomal protein S14 ( rpsN )                          |

|         |    |                                                                                 |
|---------|----|---------------------------------------------------------------------------------|
| NMB0156 | 13 | 30S ribosomal protein S8 ( rpsH )                                               |
| NMB0157 | 13 | 50S ribosomal protein L6 ( rplF )                                               |
| NMB0158 | 13 | 50S ribosomal protein L18 ( rplR )                                              |
| NMB0159 | 13 | 30s ribosomal protein S5 ( rpsE )                                               |
| NMB0160 | 13 | 50S ribosomal protein L30 ( rpl30 )                                             |
| NMB0161 | 8  | 50S ribosomal protein L15 ( rplO )                                              |
| NMB0162 | 11 | preprotein translocase SecY subunit ( secY )                                    |
| NMB0163 | 10 | translation initiation factor IF-1 ( infA )                                     |
| NMB0164 | 4  | 50S ribosomal protein L36 ( rpmJ )                                              |
| NMB0165 | 13 | 30S ribosomal protein S13 ( rpsM )                                              |
| NMB0167 | 13 | 30S ribosomal protein S4 ( rpsD )                                               |
| NMB0168 | 13 | DNA-directed RNA polymerase, alpha subunit ( rpoA )                             |
| NMB0169 | 13 | 50S ribosomal protein L17 ( rplQ )                                              |
| NMB0170 | 13 | septum site-determining protein MinC ( minC )                                   |
| NMB0171 | 13 | septum site-determining protein MinD ( minD )                                   |
| NMB0172 | 5  | cell division topological specificity factor ( minE )                           |
| NMB0173 | 13 | transcriptional regulator, LysR family                                          |
| NMB0174 | 12 | valyl-tRNA synthetase ( valS )                                                  |
| NMB0178 | 10 | acyl-(acyl-carrier-protein)--UDP-N-acetylglucosamine O-acyltransferase ( lpxA ) |
| NMB0179 | 13 | (3R)-hydroxymyristoyl-(acyl carrier protein) dehydratase ( fabZ )               |
| NMB0180 | 12 | UDP-3-O-(3-hydroxymyristoyl)-glucosamine N-acyltransferase ( lpxD )             |
| NMB0181 | 13 | outer membrane protein OmpH, putative                                           |
| NMB0182 | 11 | outer membrane protein Omp85 ( omp85 )                                          |
| NMB0183 | 2  | conserved hypothetical protein                                                  |
| NMB0184 | 13 | 1-deoxy-D-xylulose 5-phosphate reductoisomerase ( dxr )                         |
| NMB0185 | 12 | phosphatidate cytidyltransferase ( cdsA )                                       |
| NMB0186 | 13 | undecaprenyl pyrophosphate synthetase ( upps )                                  |
| NMB0187 | 12 | ribosome recycling factor ( fir )                                               |
| NMB0188 | 8  | conserved hypothetical protein                                                  |
| NMB0189 | 9  | hypothetical protein                                                            |
| NMB0190 | 11 | glucose inhibited division protein B ( gidB )                                   |
| NMB0191 | 10 | ParA family protein                                                             |
| NMB0192 | 11 | ribonuclease HII ( rnhB )                                                       |
| NMB0193 | 13 | glucose inhibited division protein A ( gidA )                                   |
| NMB0194 | 10 | amino acid symporter, putative                                                  |
| NMB0195 | 6  | pyridoxal phosphate biosynthetic protein PdxA ( pdxA )                          |
| NMB0196 | 13 | ribonuclease E ( rne )                                                          |
| NMB0197 | 6  | hypothetical protein                                                            |
| NMB0198 | 13 | ribosomal large subunit pseudouridine synthase C ( rluC )                       |
| NMB0199 | 13 | lipid-A-disaccharide synthase ( lpxB )                                          |
| NMB0200 | 13 | hypothetical protein                                                            |
| NMB0201 | 13 | hypothetical protein                                                            |
| NMB0202 | 13 | hypothetical protein                                                            |
| NMB0203 | 5  | dihydrodipicolinate reductase ( dapB )                                          |
| NMB0204 | 6  | lipoprotein, putative ( smpA )                                                  |
| NMB0205 | 11 | ferric uptake regulation protein ( fur )                                        |
| NMB0206 | 10 | leucyl-phenylalanyl-tRNA--protein transferase ( aat )                           |
| NMB0207 | 13 | glyceraldehyde 3-phosphate dehydrogenase ( gapA-1 )                             |
| NMB0208 | 13 | ferredoxin, 4Fe-4S bacterial type                                               |
| NMB0209 | 12 | glutathione-regulated potassium-efflux system protein ( kefB )                  |
| NMB0210 | 13 | modification methylase                                                          |
| NMB0211 | 12 | L-serine dehydratase ( sdaA )                                                   |
| NMB0212 | 6  | DNA gyrase subunit B ( gyrB )                                                   |
| NMB0213 | 10 | hypothetical protein                                                            |
| NMB0214 | 3  | oligopeptidase A ( prlC )                                                       |
| NMB0215 | 12 | conserved hypothetical protein                                                  |
| NMB0216 | 1  | catalase ( kat )                                                                |
| NMB0217 | 1  | RNA polymerase sigma-54 factor RpoN, putative                                   |
| NMB0218 | 6  | glycosyltransferase ( pglA )                                                    |

|         |    |                                                         |
|---------|----|---------------------------------------------------------|
| NMB0219 | 4  | 3-oxoacyl-(acyl-carrier-protein) synthase II ( fabF-1 ) |
| NMB0220 | 12 | acyl carrier protein ( acp-1 )                          |
| NMB0221 | 4  | dihydroorotate dehydrogenase ( pyrD )                   |
| NMB0222 | 13 | hypothetical protein                                    |
| NMB0223 | 11 | hypothetical protein                                    |
| NMB0224 | 9  | glutamate-ammonia-ligase adenylyltransferase ( glnE )   |
| NMB0232 | 7  | DNA helicase II ( uvrD )                                |
| NMB0234 | 13 | hypothetical protein                                    |
| NMB0235 | 13 | hypothetical protein                                    |
| NMB0237 | 13 | hypothetical protein                                    |
| NMB0238 | 13 | IS1016 family transposase                               |
| NMB0239 | 13 | hypothetical protein                                    |
| NMB0240 | 6  | hypothetical protein                                    |
| NMB0241 | 13 | NADH dehydrogenase I, A subunit ( nuoA )                |
| NMB0242 | 9  | NADH dehydrogenase I, B subunit ( nuoB )                |
| NMB0243 | 6  | NADH dehydrogenase I, C subunit ( nuoC )                |
| NMB0244 | 6  | NADH dehydrogenase I, D subunit ( nuoD )                |
| NMB0245 | 11 | NADH dehydrogenase I, E subunit ( nuoE )                |
| NMB0246 | 11 | NADH dehydrogenase I, F subunit ( nuoF )                |
| NMB0247 | 7  | hypothetical protein                                    |
| NMB0249 | 8  | NADH dehydrogenase I, G subunit ( nuoG )                |
| NMB0250 | 13 | NADH dehydrogenase I, H subunit ( nuoH )                |
| NMB0251 | 13 | NADH dehydrogenase I, I subunit ( nuoI )                |
| NMB0253 | 7  | NADH dehydrogenase I, J subunit ( nuoJ )                |
| NMB0254 | 10 | NADH dehydrogenase I, K subunit ( nuoK )                |
| NMB0255 | 5  | cell filamentation protein Fic-related protein          |
| NMB0256 | 6  | hypothetical protein                                    |
| NMB0257 | 8  | NADH dehydrogenase I, L subunit ( nuoL )                |
| NMB0258 | 6  | NADH dehydrogenase I, M subunit ( nuoM )                |
| NMB0259 | 12 | NADH dehydrogenase I, N subunit ( nuoN )                |
| NMB0260 | 10 | hypothetical protein                                    |
| NMB0261 | 9  | geranyltranstransferase ( ispA )                        |
| NMB0262 | 8  | exodeoxyribonuclease, small subunit ( xseB )            |
| NMB0263 | 7  | conserved hypothetical protein                          |
| NMB0264 | 6  | ABC transporter, ATP-binding protein                    |
| NMB0265 | 13 | Holliday junction DNA helicase RuvA ( ruvA )            |
| NMB0266 | 10 | conserved hypothetical protein                          |
| NMB0267 | 13 | conserved hypothetical protein                          |
| NMB0268 | 9  | RNA methyltransferase, TrmH family                      |
| NMB0269 | 3  | bioH protein, putative                                  |
| NMB0270 | 9  | bioH protein, putative                                  |
| NMB0271 | 10 | hypothetical protein                                    |
| NMB0272 | 11 | hypothetical protein                                    |
| NMB0274 | 13 | ATP-dependent DNA helicase RecQ ( recQ )                |
| NMB0275 | 13 | indole-3-glycerol phosphate synthase ( trpC )           |
| NMB0276 | 13 | conserved hypothetical protein                          |
| NMB0277 | 13 | virulence factor MviN ( mviN )                          |
| NMB0278 | 13 | thiol:disulfide interchange protein DsbA ( dsbA-1 )     |
| NMB0279 | 12 | conserved hypothetical protein                          |
| NMB0280 | 7  | organic solvent tolerance protein, putative             |
| NMB0281 | 10 | peptidyl-prolyl cis-trans isomerase                     |
| NMB0282 | 13 | ribonuclease II-related protein                         |
| NMB0283 | 13 | conserved hypothetical protein                          |
| NMB0284 | 13 | adenylosuccinate lyase ( purB )                         |
| NMB0284 | 13 | adenylosuccinate lyase ( purB )                         |
| NMB0286 | 10 | conserved hypothetical protein                          |
| NMB0287 | 13 | probable ATP-dependent helicase DinG ( dinG )           |
| NMB0288 | 13 | hypothetical protein                                    |
| NMB0289 | 8  | deoxyribodipyrimidine photolyase, ( phrB )              |

|         |    |                                                                         |
|---------|----|-------------------------------------------------------------------------|
| NMB0290 | 12 | transcriptional regulator, putative                                     |
| NMB0291 | 12 | conserved hypothetical protein                                          |
| NMB0292 | 13 | conserved hypothetical protein                                          |
| NMB0294 | 9  | thiol:disulfide interchange protein DsbA                                |
| NMB0295 | 11 | signal recognition particle protein ( ffh )                             |
| NMB0296 | 13 | CcsA-related protein                                                    |
| NMB0296 | 13 | CcsA-related protein                                                    |
| NMB0297 | 7  | hypothetical protein                                                    |
| NMB0299 | 13 | putative DNA transport competence protein                               |
| NMB0302 | 13 | IS1016 transposase                                                      |
| NMB0305 | 1  | hypothetical protein                                                    |
| NMB0307 | 13 | phospho-2-dehydro-3-deoxyheptonate aldolase, phe-sensitive ( aroG )     |
| NMB0308 | 7  | dihydrofolate reductase ( folA )                                        |
| NMB0309 | 12 | conserved hypothetical protein                                          |
| NMB0310 | 4  | conserved hypothetical protein                                          |
| NMB0311 | 6  | hypothetical protein                                                    |
| NMB0312 | 6  | vapA                                                                    |
| NMB0314 | 9  | hypothetical protein                                                    |
| NMB0315 | 6  | conserved hypothetical protein                                          |
| NMB0316 | 7  | conserved hypothetical protein                                          |
| NMB0317 | 10 | conserved hypothetical protein                                          |
| NMB0318 | 9  | fatty acid efflux system protein ( farA )                               |
| NMB0319 | 9  | fatty acid efflux system protein ( farB )                               |
| NMB0320 | 11 | hypothetical protein                                                    |
| NMB0321 | 10 | 50S ribosomal protein L28 ( rpmB )                                      |
| NMB0322 | 13 | 50S ribosomal protein L33 ( rpmG )                                      |
| NMB0323 | 13 | UbiH family protein                                                     |
| NMB0324 | 13 | 50S ribosomal protein L27 ( rpmA )                                      |
| NMB0325 | 13 | 50S ribosomal protein L21 ( rplU )                                      |
| NMB0326 | 9  | octaprenyl-diphosphate synthase ( ispB )                                |
| NMB0327 | 9  | conserved hypothetical protein                                          |
| NMB0329 | 13 | type IV pilus assembly protein ( pilF )                                 |
| NMB0330 | 10 | conserved hypothetical protein                                          |
| NMB0333 | 13 | pilus assembly protein PilG ( pilG )                                    |
| NMB0334 | 12 | glucose-6-phosphate isomerase ( pgi-1 )                                 |
| NMB0335 | 2  | 2,3,4,5-tetrahydropyridine-2-carboxylate N-succinyltransferase ( dapD ) |
| NMB0336 | 12 | enoyl-(acyl-carrier-protein) reductase ( fabI )                         |
| NMB0337 | 6  | branched-chain amino acid aminotransferase, putative                    |
| NMB0338 | 12 | hypothetical protein                                                    |
| NMB0339 | 7  | conserved hypothetical protein                                          |
| NMB0341 | 13 | TspA protein                                                            |
| NMB0342 | 13 | intracellular septation protein A ( ispA )                              |
| NMB0343 | 9  | conserved hypothetical protein                                          |
| NMB0344 | 12 | BolA-YrbA family protein                                                |
| NMB0345 | 13 | cell-binding factor, putative                                           |
| NMB0346 | 13 | hypothetical protein                                                    |
| NMB0347 | 13 | conserved hypothetical protein                                          |
| NMB0348 | 13 | conserved hypothetical protein                                          |
| NMB0349 | 12 | glutamyl-tRNA synthetase-related protein                                |
| NMB0350 | 12 | hypothetical protein                                                    |
| NMB0351 | 10 | transaldolase ( tal )                                                   |
| NMB0352 | 13 | sugar isomerase, KpsF-GutQ family                                       |
| NMB0353 | 13 | conserved hypothetical protein                                          |
| NMB0354 | 13 | hypothetical protein                                                    |
| NMB0355 | 12 | conserved hypothetical protein                                          |
| NMB0356 | 5  | ABC transporter, ATP-binding protein                                    |
| NMB0357 | 12 | monofunctional biosynthetic peptidoglycan transglycosylase ( mtgA )     |
| NMB0358 | 13 | shikimate 5-dehydrogenase ( aroE )                                      |
| NMB0359 | 13 | glutamate--ammonia ligase ( glnA )                                      |

|         |    |                                                                                              |
|---------|----|----------------------------------------------------------------------------------------------|
| NMB0360 | 13 | AmpG-related protein                                                                         |
| NMB0361 | 13 | conserved hypothetical protein                                                               |
| NMB0362 | 13 | hypothetical protein                                                                         |
| NMB0364 | 10 | FrpC operon protein                                                                          |
| NMB0365 | 10 | iron-regulated protein FrpC                                                                  |
| NMB0366 | 13 | hypothetical protein                                                                         |
| NMB0367 | 13 | hypothetical protein                                                                         |
| NMB0368 | 12 | hypothetical protein                                                                         |
| NMB0370 | 13 | hypothetical protein                                                                         |
| NMB0371 | 13 | hypothetical protein                                                                         |
| NMB0373 | 7  | hypothetical protein                                                                         |
| NMB0374 | 13 | MafB-related protein                                                                         |
| NMB0375 | 10 | mafA protein ( mafA-2 )                                                                      |
| NMB0376 | 9  | hypothetical protein                                                                         |
| NMB0377 | 7  | conserved hypothetical protein                                                               |
| NMB0378 | 10 | phosphate permease, putative                                                                 |
| NMB0379 | 11 | oxygen-independent coproporphyrinogen III oxidase ( hemN )                                   |
| NMB0381 | 13 | cys regulon transcriptional activator ( cysB )                                               |
| NMB0382 | 13 | outer membrane protein class 4 ( rmpM )                                                      |
| NMB0383 | 12 | hypothetical protein                                                                         |
| NMB0384 | 13 | hypothetical protein                                                                         |
| NMB0385 | 7  | thiamin-monophosphate kinase ( thiL )                                                        |
| NMB0386 | 7  | phosphatidylglycerophosphatase A ( pgpA )                                                    |
| NMB0387 | 9  | ABC transporter, ATP-binding protein                                                         |
| NMB0388 | 13 | sugar transporter, putative                                                                  |
| NMB0388 | 10 | sugar transporter, putative                                                                  |
| NMB0389 | 10 | aldose 1-epimerase ( galM )                                                                  |
| NMB0390 | 6  | maltose phosphorylase ( mapA )                                                               |
| NMB0391 | 7  | beta-phosphoglucomutase ( pgmB )                                                             |
| NMB0392 | 4  | l-aspartate oxidase ( nadB )                                                                 |
| NMB0394 | 7  | quinolinate synthetase A ( nadA )                                                            |
| NMB0395 | 12 | conserved hypothetical protein                                                               |
| NMB0396 | 13 | nicotinate-nucleotide pyrophosphorylase ( nadC )                                             |
| NMB0397 | 7  | hypothetical protein                                                                         |
| NMB0398 | 13 | transcriptional regulator, ArsR family                                                       |
| NMB0399 | 13 | exodeoxyribonuclease III ( xthA )                                                            |
| NMB0400 | 8  | transposase                                                                                  |
| NMB0401 | 11 | proline dehydrogenase ( putA )                                                               |
| NMB0402 | 13 | sodium/proline symporter ( putP )                                                            |
| NMB0403 | 9  | hypothetical protein                                                                         |
| NMB0404 | 13 | conserved hypothetical protein                                                               |
| NMB0405 | 13 | competence protein ComM ( comM )                                                             |
| NMB0407 | 7  | thiol:disulfide interchange protein DsbA ( dsbA-3 )                                          |
| NMB0408 | 12 | bacitracin resistance protein ( bacA )                                                       |
| NMB0409 | 13 | conserved hypothetical protein                                                               |
| NMB0410 | 13 | conserved hypothetical protein                                                               |
| NMB0411 | 7  | conserved hypothetical protein                                                               |
| NMB0412 | 9  | cell division protein FtsL-related protein                                                   |
| NMB0413 | 13 | penicillin-binding protein 2 ( penA )                                                        |
| NMB0414 | 13 | UDP-N-acetylmuramoylalanyl-D-glutamate--2,6-diaminopimelate ligase ( murE )                  |
| NMB0416 | 7  | UDP-N-acetylmuramoylalanyl-D-glutamyl-2,6-diaminopimelate--D-alanyl-D-alanyl ligase ( murF ) |
| NMB0417 | 13 | hypothetical protein ( dcaB )                                                                |
| NMB0418 | 13 | phospho-N-acetylmuramoyl-pentapeptide-transferase ( mraY )                                   |
| NMB0419 | 11 | conserved hypothetical protein ( dcaC )                                                      |
| NMB0420 | 13 | UDP-N-acetylmuramoylalanine--D-glutamate ligase ( murD )                                     |
| NMB0421 | 13 | cell division protein FtsW ( ftsW )                                                          |
| NMB0422 | 12 | cell division transferase protein MurG ( murG )                                              |
| NMB0423 | 12 | UDP-N-acetylmuramate--alanine ligase ( murC )                                                |
| NMB0424 | 12 | D-alanine--D-alanine ligase ( ddlB )                                                         |

|         |    |                                                                                                     |
|---------|----|-----------------------------------------------------------------------------------------------------|
| NMB0425 | 7  | cell division protein FtsQ ( ftsQ )                                                                 |
| NMB0426 | 3  | cell division protein FtsA ( ftsA )                                                                 |
| NMB0427 | 13 | cell division protein FtsZ ( ftsZ )                                                                 |
| NMB0428 | 13 | conserved hypothetical protein                                                                      |
| NMB0436 | 13 | conserved hypothetical protein                                                                      |
| NMB0437 | 13 | conserved hypothetical protein                                                                      |
| NMB0438 | 10 | hypothetical protein                                                                                |
| NMB0439 | 13 | conserved hypothetical protein                                                                      |
| NMB0440 | 11 | prephenate dehydrogenase, putative                                                                  |
| NMB0442 | 13 | opacity protein (opa)                                                                               |
| NMB0444 | 12 | conserved hypothetical protein                                                                      |
| NMB0445 | 13 | bicyclomycin resistance protein, putative                                                           |
| NMB0447 | 8  | DNA repair protein RecO ( recO )                                                                    |
| NMB0448 | 13 | pyridoxal phosphate biosynthetic protein PdxJ ( pdxJ )                                              |
| NMB0452 | 13 | holo-(acyl-carrier protein) synthase ( acpS )                                                       |
| NMB0453 | 13 | mutT protein ( mutT )                                                                               |
| NMB0454 | 13 | hypothetical protein                                                                                |
| NMB0455 | 13 | conserved hypothetical protein                                                                      |
| NMB0456 | 12 | N-acetylmuramoyl-L-alanine amidase ( amiC )                                                         |
| NMB0457 | 9  | conserved hypothetical protein                                                                      |
| NMB0458 | 11 | glutamate racemase ( murI )                                                                         |
| NMB0459 | 13 | conserved hypothetical protein                                                                      |
| NMB0460 | 13 | transferrin-binding protein 2 ( tbp2 )                                                              |
| NMB0461 | 12 | transferrin-binding protein 1 ( tbp1 )                                                              |
| NMB0462 | 13 | spermidine/putrescine ABC transporter, periplasmic spermidine/putrescine-binding protein ( potD-1 ) |
| NMB0463 | 12 | 30S ribosomal protein S20 ( rpsT )                                                                  |
| NMB0464 | 7  | phospholipase A1, putative                                                                          |
| NMB0465 | 13 | conserved hypothetical protein                                                                      |
| NMB0466 | 9  | aspartyl-tRNA synthetase ( aspS )                                                                   |
| NMB0467 | 13 | hypothetical protein                                                                                |
| NMB0475 | 13 | hypothetical protein                                                                                |
| NMB0476 | 10 | hypothetical protein                                                                                |
| NMB0477 | 13 | conserved hypothetical protein                                                                      |
| NMB0478 | 13 | hypothetical protein                                                                                |
| NMB0479 | 13 | conserved hypothetical protein                                                                      |
| NMB0483 | 6  | putative integral membrane protein                                                                  |
| NMB0488 | 10 | hypothetical protein                                                                                |
| NMB0490 | 12 | PspA-related protein                                                                                |
| NMB0491 | 12 | hypothetical protein                                                                                |
| NMB0492 | 12 | hypothetical protein                                                                                |
| NMB0493 | 13 | hemagglutinin/hemolysin-related protein                                                             |
| NMB0494 | 12 | DNA helicase, truncation                                                                            |
| NMB0495 | 11 | replication protein                                                                                 |
| NMB0512 | 13 | hypothetical protein                                                                                |
| NMB0524 | 7  | ribonuclease BN, putative                                                                           |
| NMB0525 | 7  | aluminum resistance protein, putative                                                               |
| NMB0526 | 13 | hypothetical protein                                                                                |
| NMB0527 | 13 | 6-pyruvoyl tetrahydrobiopterin synthase, putative                                                   |
| NMB0528 | 13 | conserved hypothetical protein                                                                      |
| NMB0529 | 13 | conserved hypothetical protein                                                                      |
| NMB0530 | 8  | glycosyl hydrolase, family 3                                                                        |
| NMB0531 | 12 | conserved hypothetical protein                                                                      |
| NMB0532 | 7  | DO like serine protease (htrA family)                                                               |
| NMB0533 | 12 | endonuclease III ( nth )                                                                            |
| NMB0534 | 13 | conserved hypothetical protein                                                                      |
| NMB0536 | 6  | Na <sup>+</sup> /H <sup>+</sup> antiporter                                                          |
| NMB0537 | 13 | conserved hypothetical protein                                                                      |
| NMB0538 | 13 | conserved hypothetical protein                                                                      |
| NMB0539 | 13 | porphobilinogen deaminase ( hemC )                                                                  |

|         |    |                                                                     |
|---------|----|---------------------------------------------------------------------|
| NMB0540 | 7  | aspartate aminotransferase ( aspC )                                 |
| NMB0542 | 9  | hypothetical protein                                                |
| NMB0543 | 4  | L-lactate permease, putative                                        |
| NMB0544 | 7  | conserved hypothetical protein                                      |
| NMB0545 | 8  | conserved hypothetical protein                                      |
| NMB0546 | 8  | alcohol dehydrogenase, propanol-preferring ( adhP )                 |
| NMB0547 | 13 | type IV pilin protein ( pilV )                                      |
| NMB0548 | 12 | AcrA-AcrE family protein                                            |
| NMB0549 | 13 | ABC transporter, ATP-binding protein ( ybjZ )                       |
| NMB0550 | 13 | thiol:disulfide interchange protein DsbC                            |
| NMB0551 | 12 | primosomal protein n` ( priA )                                      |
| NMB0552 | 10 | hypothetical protein                                                |
| NMB0553 | 8  | transposase                                                         |
| NMB0554 | 13 | dnaK protein ( dnaK )                                               |
| NMB0555 | 13 | hypothetical protein                                                |
| NMB0556 | 12 | repressor protein, putative                                         |
| NMB0557 | 13 | conserved hypothetical protein                                      |
| NMB0558 | 12 | hypothetical protein                                                |
| NMB0559 | 13 | ubiquinone biosynthesis protein AarF ( aarF )                       |
| NMB0560 | 13 | serine acetyltransferase ( cysE )                                   |
| NMB0561 | 13 | grpE protein ( grpE )                                               |
| NMB0562 | 13 | conserved hypothetical protein                                      |
| NMB0563 | 13 | thiamine biosynthesis lipoprotein ApbE ( apbE )                     |
| NMB0564 | 13 | Na(\+)-translocating NADH-quinone reductase, subunit F ( nqrF )     |
| NMB0565 | 13 | Na(\+)-translocating NADH-quinone reductase, subunit E ( nqrE )     |
| NMB0566 | 12 | Na(\+)-translocating NADH-quinone reductase, subunit D ( nqrD )     |
| NMB0567 | 13 | Na(\+)-translocating NADH-quinone reductase, subunit C ( nqrC )     |
| NMB0568 | 12 | Na(\+)-translocating NADH-quinone reductase, subunit B ( nqrB )     |
| NMB0569 | 12 | Na(\+)-translocating NADH-quinone reductase, subunit A ( nqrA )     |
| NMB0570 | 12 | hypothetical protein                                                |
| NMB0571 | 13 | conserved hypothetical protein                                      |
| NMB0572 | 9  | hypothetical protein                                                |
| NMB0573 | 13 | transcriptional regulator, AsnC family                              |
| NMB0574 | 13 | glycine cleavage system T protein ( gcvT )                          |
| NMB0575 | 13 | glycine cleavage system H protein ( gcvH )                          |
| NMB0576 | 13 | glutamyl-tRNA reductase ( hemA )                                    |
| NMB0577 | 13 | regulatory protein ( nosR )                                         |
| NMB0578 | 13 | copper ABC transporter, periplasmic copper-binding protein ( nosD ) |
| NMB0579 | 10 | copper ABC transporter, ATP-binding protein ( nosF )                |
| NMB0580 | 13 | protein disulfide isomerase NosL, putative                          |
| NMB0581 | 13 | electron transfer flavoprotein-ubiquinone oxidoreductase            |
| NMB0582 | 12 | bacteriocin resistance protein, putative                            |
| NMB0583 | 13 | IS1016 transposase                                                  |
| NMB0584 | 10 | FrpC operon protein                                                 |
| NMB0586 | 12 | periplasmic binding protein for ABC transporter                     |
| NMB0587 | 7  | membrane protein                                                    |
| NMB0588 | 9  | ABC transporter, ATP-binding protein                                |
| NMB0589 | 13 | 50s ribosomal protein L19 ( rplS )                                  |
| NMB0590 | 10 | tRNA (guanine-N1)-methyltransferase ( trmD )                        |
| NMB0591 | 7  | 16S rRNA processing protein RimM ( rimM )                           |
| NMB0592 | 7  | 30S ribosomal protein S16 ( rpsP )                                  |
| NMB0593 | 7  | conserved hypothetical protein (dead)                               |
| NMB0594 | 9  | sensor histidine kinase                                             |
| NMB0595 | 3  | DNA-binding response regulator                                      |
| NMB0596 | 4  | hypothetical protein                                                |
| NMB0597 | 4  | hypothetical protein                                                |
| NMB0598 | 12 | Maf-YceF-YhdE family protein                                        |
| NMB0599 | 8  | conserved hypothetical protein                                      |
| NMB0600 | 10 | hypothetical protein                                                |



|         |    |                                                                                                     |
|---------|----|-----------------------------------------------------------------------------------------------------|
| NMB0601 | 11 | conserved hypothetical protein                                                                      |
| NMB0602 | 9  | hitA protein ( hitA )                                                                               |
| NMB0603 | 2  | phosphoribosyl-ATP cyclohydrolase ( hisE )                                                          |
| NMB0604 | 12 | alcohol dehydrogenase, zinc-containing                                                              |
| NMB0605 | 6  | histone deacetylase family protein                                                                  |
| NMB0607 | 6  | protein-export membrane protein SecD ( secD )                                                       |
| NMB0608 | 10 | protein-export membrane protein SecF ( secF )                                                       |
| NMB0609 | 9  | 30s ribosomal protein S15 ( rpsO )                                                                  |
| NMB0610 | 12 | spermidine/putrescine ABC transporter, ATP-binding protein ( potA-1 )                               |
| NMB0611 | 11 | spermidine/putrescine ABC transporter, permease protein ( potB )                                    |
| NMB0612 | 7  | spermidine/putrescine ABC transporter, permease protein (potC)                                      |
| NMB0613 | 9  | hypothetical protein                                                                                |
| NMB0614 | 10 | oxidoreductase, putative                                                                            |
| NMB0615 | 11 | ammonium transporter AmtB, putative                                                                 |
| NMB0616 | 13 | IS1016 family transposase                                                                           |
| NMB0617 | 6  | transcription termination factor Rho ( rho )                                                        |
| NMB0618 | 8  | phosphoenolpyruvate synthase ( ppsA )                                                               |
| NMB0619 | 5  | conserved hypothetical protein                                                                      |
| NMB0620 | 8  | phosphoglycolate phosphatase ( pgp )                                                                |
| NMB0621 | 6  | conserved hypothetical protein                                                                      |
| NMB0622 | 6  | outer membrane lipoprotein carrier protein ( loaA )                                                 |
| NMB0623 | 13 | spermidine/putrescine ABC transporter, periplasmic spermidine/putrescine-binding protein ( potD-2 ) |
| NMB0624 | 13 | glycosyltransferase                                                                                 |
| NMB0625 | 2  | conserved hypothetical protein                                                                      |
| NMB0626 | 7  | peptide chain release factor 3 ( prfC )                                                             |
| NMB0627 | 12 | phosphoribosyl-AMP cyclohydrolase ( hisI )                                                          |
| NMB0628 | 8  | hisF protein ( hisF )                                                                               |
| NMB0629 | 8  | phosphotransacetylase, putative                                                                     |
| NMB0630 | 10 | amidotransferase HisH ( hisH )                                                                      |
| NMB0631 | 10 | phosphate acetyltransferase Pta, putative                                                           |
| NMB0632 | 5  | iron(III) ABC transporter, ATP-binding protein ( fbpC )                                             |
| NMB0633 | 13 | iron(III) ABC transporter, permease protein ( fbpB )                                                |
| NMB0634 | 13 | iron(III) ABC transporter, periplasmic binding protein ( fbpA )                                     |
| NMB0636 | 13 | hypothetical protein                                                                                |
| NMB0637 | 9  | argininosuccinate lyase ( argH )                                                                    |
| NMB0638 | 13 | UTP--glucose-1-phosphate uridylyltransferase ( galU )                                               |
| NMB0639 | 12 | conserved hypothetical protein                                                                      |
| NMB0640 | 13 | hypothetical protein                                                                                |
| NMB0641 | 13 | inorganic pyrophosphatase ( ppa )                                                                   |
| NMB0642 | 13 | dATP pyrophosphohydrolase ( ntpA )                                                                  |
| NMB0643 | 12 | MafB adhesion protein                                                                               |
| NMB0644 | 12 | hypothetical protein                                                                                |
| NMB0646 | 13 | ribonuclease inhibitor barstar                                                                      |
| NMB0648 | 13 | hypothetical protein                                                                                |
| NMB0649 | 12 | hypothetical protein                                                                                |
| NMB0650 | 13 | hypothetical protein                                                                                |
| NMB0651 | 13 | hypothetical protein                                                                                |
| NMB0652 | 10 | mafA protein ( mafA-2 )                                                                             |
| NMB0653 | 13 | MafB-related protein                                                                                |
| NMB0656 | 2  | hypothetical protein                                                                                |
| NMB0657 | 12 | MafB related sequence                                                                               |
| NMB0658 | 12 | MafB related sequence                                                                               |
| NMB0659 | 11 | hypothetical protein                                                                                |
| NMB0660 | 13 | hypothetical protein                                                                                |
| NMB0661 | 9  | transmembrane potassium transporter (trkH)                                                          |
| NMB0662 | 13 | hypothetical protein                                                                                |
| NMB0663 | 8  | outer membrane protein NsgA ( nsgA )                                                                |
| NMB0664 | 3  | hypothetical protein                                                                                |
| NMB0665 | 12 | oxygen-independent coprophorphyrinogen III oxidase family protein                                   |

|         |    |                                                                     |
|---------|----|---------------------------------------------------------------------|
| NMB0666 | 6  | DNA ligase ( ligA-1 )                                               |
| NMB0667 | 13 | hypothetical protein                                                |
| NMB0668 | 12 | ampD protein ( ampD )                                               |
| NMB0669 | 4  | conserved hypothetical protein                                      |
| NMB0670 | 9  | thymidylate kinase ( tmk )                                          |
| NMB0671 | 12 | malate oxidoreductase (NAD) ( sfcA )                                |
| NMB0672 | 9  | tetraacyldisaccharide 4 <sup>-</sup> -kinase ( lpxK )               |
| NMB0673 | 7  | hypothetical protein                                                |
| NMB0674 | 13 | conserved hypothetical protein                                      |
| NMB0675 | 13 | 3-deoxy-D-manno-octulosonate cytidyltransferase ( kdsB )            |
| NMB0676 | 10 | hypothetical protein                                                |
| NMB0678 | 12 | tryptophan synthase, alpha subunit ( trpA )                         |
| NMB0679 | 12 | acetyl-CoA carboxylase, carboxyl transferase beta subunit (accD)    |
| NMB0680 | 7  | cryptic protein ( cnp1 )                                            |
| NMB0681 | 9  | conserved hypothetical protein                                      |
| NMB0682 | 7  | dihydroorotase ( pyrC )                                             |
| NMB0683 | 9  | N utilization substance protein B ( nusB )                          |
| NMB0685 | 13 | hypothetical protein                                                |
| NMB0686 | 7  | ribonuclease III ( rnc )                                            |
| NMB0687 | 12 | GTP-binding protein Era ( era )                                     |
| NMB0688 | 12 | N-(5 prime -phosphoribosyl)anthranilate isomerase ( trpF )          |
| NMB0689 | 13 | transcription elongation factor GreB ( greB )                       |
| NMB0690 | 13 | amidophosphoribosyltransferase ( purF )                             |
| NMB0691 | 7  | colicin V production protein, putative                              |
| NMB0692 | 4  | tpc protein ( tpc )                                                 |
| NMB0693 | 3  | folypolyglutamate synthase-dihydrofolate synthase ( folC )          |
| NMB0694 | 6  | folI protein ( folI )                                               |
| NMB0695 | 10 | hypothetical protein                                                |
| NMB0696 | 12 | amino acid ABC transporter, ATP-binding protein                     |
| NMB0697 | 12 | dimethyladenosine transferase ( ksgA )                              |
| NMB0698 | 13 | hypothetical protein                                                |
| NMB0699 | 10 | tryptophan synthase, beta subunit ( trpB )                          |
| NMB0702 | 7  | competence protein ComA ( comA )                                    |
| NMB0703 | 12 | competence lipoprotein ComL ( comL )                                |
| NMB0704 | 6  | ribosomal large subunit pseudouridine synthase D ( rluD )           |
| NMB0705 | 8  | transporter                                                         |
| NMB0706 | 9  | conserved hypothetical protein                                      |
| NMB0707 | 13 | rare lipoprotein B, putative                                        |
| NMB0708 | 12 | DNA polymerase III, delta subunit ( hoIA )                          |
| NMB0709 | 13 | Hypothetical protein                                                |
| NMB0710 | 12 | Hypothetical protein                                                |
| NMB0711 | 12 | conserved hypothetical protein                                      |
| NMB0712 | 13 | RNA polymerase sigma-32 factor ( rpoH )                             |
| NMB0713 | 13 | apolipoprotein N-acyltransferase, putative                          |
| NMB0717 | 12 | cytochrome, putative                                                |
| NMB0718 | 12 | ferrochelataase ( hemH )                                            |
| NMB0719 | 13 | queuine tRNA-ribosyltransferase ( tgt )                             |
| NMB0720 | 10 | threonyl-tRNA synthetase ( thrS )                                   |
| NMB0721 | 12 | translation initiation factor 3 ( infC )                            |
| NMB0722 | 13 | 50S ribosomal protein L35 ( rpmI )                                  |
| NMB0723 | 12 | 50S ribosomal protein L20 ( rplT )                                  |
| NMB0724 | 7  | phenylalanyl-tRNA synthetase, alpha chain ( pheS )                  |
| NMB0728 | 13 | phenylalanyl-tRNA synthetase, beta chain ( pheT )                   |
| NMB0729 | 13 | integration host factor, alpha subunit ( himA )                     |
| NMB0732 | 13 | adenosylmethionine-8-amino-7-oxononanoate aminotransferase ( bioA ) |
| NMB0733 | 13 | dethiobiotin synthase ( bioD )                                      |
| NMB0734 | 13 | hypothetical protein                                                |
| NMB0735 | 13 | 4-hydroxybenzoate octaprenyltransferase ( ubiA )                    |
| NMB0736 | 10 | PTS system, nitrogen regulatory IIA protein ( ptsN )                |

|         |    |                                                                                |
|---------|----|--------------------------------------------------------------------------------|
| NMB0737 | 5  | HPr kinase/phosphatase, putative                                               |
| NMB0738 | 13 | conserved hypothetical protein                                                 |
| NMB0739 | 12 | conserved hypothetical protein                                                 |
| NMB0740 | 13 | DNA repair protein RecN ( recN )                                               |
| NMB0741 | 13 | conserved hypothetical protein                                                 |
| NMB0742 | 13 | conserved hypothetical protein                                                 |
| NMB0743 | 13 | ubiquinone/menaquinone biosynthesis methyltransferase UbiE ( ubiE )            |
| NMB0744 | 13 | hypothetical protein                                                           |
| NMB0745 | 13 | 2-amino-4-hydroxy-6-hydroxymethylidihydropteridine-pyrophosphokinase ( folK )  |
| NMB0746 | 11 | conserved hypothetical protein                                                 |
| NMB0747 | 5  | conserved hypothetical protein                                                 |
| NMB0748 | 7  | host factor-I ( hfq )                                                          |
| NMB0749 | 11 | penicillin-binding protein 4                                                   |
| NMB0750 | 7  | bacterioferritin comigratory protein ( bcp )                                   |
| NMB0751 | 2  | integrase/recombinase XerD ( xerD )                                            |
| NMB0752 | 3  | bacterioferritin-associated ferredoxin, putative                               |
| NMB0753 | 3  | conserved hypothetical protein                                                 |
| NMB0756 | 9  | dTDP-L-rhamnose synthase, putative                                             |
| NMB0757 | 11 | phosphoribosylaminoimidazole-succinocarboxamide synthase ( purC )              |
| NMB0758 | 9  | polyribonucleotide nucleotidyltransferase ( pnp )                              |
| NMB0759 | 10 | conserved hypothetical protein                                                 |
| NMB0760 | 10 | diaminopimelate epimerase ( dapF )                                             |
| NMB0761 | 12 | hypothetical protein                                                           |
| NMB0762 | 9  | hypothetical protein                                                           |
| NMB0763 | 12 | cysteine synthase ( cysK )                                                     |
| NMB0764 | 9  | conserved hypothetical protein                                                 |
| NMB0765 | 12 | signal peptidase I ( lepB )                                                    |
| NMB0766 | 13 | GTP-binding protein LepA ( lepA )                                              |
| NMB0767 | 13 | 5-methylthioadenosine nucleosidase-S-adenosylhomocysteine nucleosidase ( pfs ) |
| NMB0768 | 8  | twitching motility protein PilT ( pilT-2 )                                     |
| NMB0769 | 6  | DNA polymerase III, delta prime subunit, putative                              |
| NMB0770 | 8  | type IV pilus assembly protein PilZ, putative                                  |
| NMB0771 | 7  | conserved hypothetical protein                                                 |
| NMB0773 | 7  | conserved hypothetical protein                                                 |
| NMB0774 | 6  | uracil phosphoribosyltransferase ( upp )                                       |
| NMB0775 | 6  | hypothetical protein                                                           |
| NMB0776 | 9  | conserved hypothetical protein                                                 |
| NMB0777 | 12 | uroporphyrinogen-III synthase HemD, putative                                   |
| NMB0778 | 7  | uroporphyrin-III C-methyltransferase HemX, putative                            |
| NMB0779 | 7  | hypothetical protein                                                           |
| NMB0780 | 12 | hypothetical protein                                                           |
| NMB0781 | 7  | uroporphyrinogen decarboxylase ( hemE )                                        |
| NMB0782 | 10 | DNA repair protein RadA ( radA )                                               |
| NMB0783 | 10 | conserved hypothetical protein                                                 |
| NMB0784 | 13 | phage shock protein E precursor, putative                                      |
| NMB0785 | 7  | exodeoxyribonuclease V 135 KD polypeptide ( recB )                             |
| NMB0786 | 8  | conserved hypothetical protein                                                 |
| NMB0787 | 13 | amino acid ABC transporter, periplasmic amino acid-binding protein             |
| NMB0788 | 13 | amino acid ABC transporter, permease protein                                   |
| NMB0789 | 13 | amino acid ABC transporter, ATP-binding protein                                |
| NMB0790 | 13 | phosphoglucomutase ( pgm )                                                     |
| NMB0791 | 12 | peptidyl-prolyl cis-trans isomerase                                            |
| NMB0792 | 9  | transporter, NadC family                                                       |
| NMB0793 | 13 | hypothetical protein                                                           |
| NMB0794 | 1  | hypothetical protein                                                           |
| NMB0795 | 13 | peptidyl-tRNA hydrolase ( pth )                                                |
| NMB0796 | 13 | conserved hypothetical protein                                                 |
| NMB0797 | 13 | conserved hypothetical protein                                                 |
| NMB0798 | 13 | cell division protein FtsH ( ftsH )                                            |

|         |    |                                                               |
|---------|----|---------------------------------------------------------------|
| NMB0799 | 13 | cell division protein FtsJ ( ftsJ )                           |
| NMB0800 | 12 | conserved hypothetical protein                                |
| NMB0801 | 13 | delta-aminolevulinic acid dehydratase ( hemB )                |
| NMB0802 | 13 | cystathionine gamma-synthase ( metB )                         |
| NMB0803 | 13 | conserved hypothetical protein                                |
| NMB0804 | 10 | NAD(P)H nitroreductase, putative                              |
| NMB0806 | 10 | conserved hypothetical protein                                |
| NMB0807 | 13 | conserved hypothetical protein                                |
| NMB0808 | 13 | hypothetical protein                                          |
| NMB0809 | 10 | conserved hypothetical protein                                |
| NMB0811 | 10 | UDP-N-acetylpyruvoylglucosamine reductase ( murB )            |
| NMB0812 | 13 | conserved hypothetical protein                                |
| NMB0814 | 12 | histidyl-tRNA synthetase ( hisS-1 )                           |
| NMB0815 | 5  | adenylosuccinate synthetase ( purA )                          |
| NMB0822 | 11 | heat shock protein HtpX ( htpX )                              |
| NMB0823 | 10 | adenylate kinase ( adk )                                      |
| NMB0824 | 8  | orotidine 5'-phosphate decarboxylase ( pyrF )                 |
| NMB0825 | 13 | ADP-heptose synthase, putative                                |
| NMB0826 | 12 | C-5 cytosine-specific DNA methylase                           |
| NMB0827 | 12 | type II restriction enzyme-related protein                    |
| NMB0828 | 10 | ADP-L-glycero-D-mannoheptose-6-epimerase ( rfaD )             |
| NMB0829 | 6  | type I restriction enzyme EcoR124II M protein ( hsdM )        |
| NMB0832 | 4  | anticodon nuclease                                            |
| NMB0835 | 8  | type I restriction enzyme EcoR124II R protein, putative       |
| NMB0836 | 13 | ATP-dependent Clp protease, ATP-binding subunit ClpA ( clpA ) |
| NMB0837 | 13 | conserved hypothetical protein                                |
| NMB0838 | 7  | transcriptional regulator, possibly cold shock related        |
| NMB0839 | 3  | pmbA protein ( pmbA )                                         |
| NMB0840 | 10 | conserved hypothetical protein                                |
| NMB0841 | 7  | hypothetical protein                                          |
| NMB0842 | 7  | single-stranded-DNA-specific exonuclease RecJ ( recJ )        |
| NMB0843 | 10 | polyA polymerase ( pcnB )                                     |
| NMB0845 | 10 | PhoH-related protein                                          |
| NMB0848 | 9  | hypothetical protein                                          |
| NMB0849 | 13 | deoxycytidine triphosphate deaminase, putative                |
| NMB0850 | 13 | hypothetical protein                                          |
| NMB0851 | 7  | recombination associated protein RdgC ( rdgC )                |
| NMB0852 | 3  | essential GTPase                                              |
| NMB0853 | 6  | conserved hypothetical protein                                |
| NMB0854 | 10 | histidyl-tRNA synthetase ( hisS-2 )                           |
| NMB0855 | 12 | bacteriocin resistance protein, putative                      |
| NMB0862 | 5  | hypothetical protein                                          |
| NMB0863 | 6  | hypothetical protein                                          |
| NMB0864 | 6  | hypothetical protein                                          |
| NMB0865 | 10 | hypothetical protein                                          |
| NMB0866 | 13 | hypothetical protein                                          |
| NMB0867 | 9  | YabO/YceC/SfhB family protein                                 |
| NMB0868 | 5  | conserved hypothetical protein                                |
| NMB0869 | 13 | hypothetical protein                                          |
| NMB0870 | 13 | 3-methyl-2-oxobutanoate hydroxymethyltransferase ( panB )     |
| NMB0871 | 12 | pantoate--beta-alanine ligase ( panC )                        |
| NMB0872 | 7  | conserved hypothetical protein                                |
| NMB0873 | 9  | outer membrane lipoprotein LolB, putative                     |
| NMB0874 | 13 | conserved hypothetical protein                                |
| NMB0875 | 9  | ribose-phosphate pyrophosphokinase ( prsA )                   |
| NMB0876 | 13 | 50S ribosomal protein L25 ( rplY )                            |
| NMB0877 | 10 | penicillin-binding protein                                    |
| NMB0878 | 12 | threonine dehydratase ( ilvA )                                |
| NMB0879 | 9  | sulfate ABC transporter, ATP-binding protein ( cysA )         |

|         |    |                                                                                           |
|---------|----|-------------------------------------------------------------------------------------------|
| NMB0880 | 11 | sulfate ABC transporter, permease protein ( cysW )                                        |
| NMB0881 | 9  | sulfate ABC transporter, permease protein ( cysT )                                        |
| NMB0882 | 7  | hypothetical protein                                                                      |
| NMB0884 | 13 | superoxide dismutase ( sodB )                                                             |
| NMB0885 | 10 | replicative DNA helicase ( dnaB )                                                         |
| NMB0886 | 11 | fimbrial protein FimT / PilH (pilH)                                                       |
| NMB0887 | 13 | type IV pilus assembly protein PilI (pilI)                                                |
| NMB0888 | 13 | type IV pilin-related protein PilJ (pilJ)                                                 |
| NMB0889 | 13 | type IV pilin-related protein PilK (pilK)                                                 |
| NMB0890 | 13 | type IV pilin-related protein PilL / PilX (pill)                                          |
| NMB0892 | 11 | AzIC-related protein                                                                      |
| NMB0893 | 10 | deoxyuridine 5'-triphosphate nucleotidohydrolase ( dut )                                  |
| NMB0894 | 13 | aminotransferase, class I                                                                 |
| NMB0895 | 11 | conserved hypothetical protein                                                            |
| NMB0897 | 9  | hypothetical protein                                                                      |
| NMB0898 | 5  | hypothetical protein                                                                      |
| NMB0899 | 4  | hypothetical protein                                                                      |
| NMB0902 | 3  | hypothetical protein                                                                      |
| NMB0903 | 3  | hypothetical protein                                                                      |
| NMB0910 | 7  | transcriptional regulator                                                                 |
| NMB0917 | 6  | death-on-curing protein                                                                   |
| NMB0918 | 6  | hypothetical protein                                                                      |
| NMB0919 | 13 | IS1106 transposase                                                                        |
| NMB0920 | 13 | isocitrate dehydrogenase ( icd )                                                          |
| NMB0921 | 7  | hypothetical protein                                                                      |
| NMB0922 | 13 | alpha-2,3-sialyltransferase                                                               |
| NMB0923 | 9  | cytochrome c                                                                              |
| NMB0924 | 10 | oxidoreductase, short-chain dehydrogenase-reductase family                                |
| NMB0925 | 8  | acyl CoA thioester hydrolase family protein                                               |
| NMB0926 | 13 | opacity protein (opa)                                                                     |
| NMB0927 | 12 | proline iminopeptidase ( pip )                                                            |
| NMB0928 | 9  | hypothetical protein                                                                      |
| NMB0929 | 5  | dihydrodipicolinate synthase ( dapA )                                                     |
| NMB0930 | 9  | xanthine-uracil permease family protein                                                   |
| NMB0931 | 1  | RNA methyltransferase, TrmH family                                                        |
| NMB0933 | 9  | cytidine and deoxycytidylate deaminase family protein                                     |
| NMB0935 | 6  | tRNA delta(2)-isopentenylpyrophosphate transferase ( miaA )                               |
| NMB0936 | 10 | hypothetical protein                                                                      |
| NMB0937 | 8  | elongation factor P (EF-P) ( efp )                                                        |
| NMB0938 | 8  | hypothetical protein                                                                      |
| NMB0939 | 7  | conserved hypothetical protein                                                            |
| NMB0940 | 13 | homoserine O-acetyltransferase                                                            |
| NMB0941 | 13 | 50S ribosomal protein L36 ( rpmJ )                                                        |
| NMB0942 | 13 | 50S ribosomal protein L31, putative ( rpmE )                                              |
| NMB0943 | 13 | 5,10-methylenetetrahydrofolate reductase ( metF )                                         |
| NMB0944 | 11 | 5-methyltetrahydropteroyltriglutamate-homocysteine methyltransferase ( metH )             |
| NMB0945 | 8  | hypothetical protein                                                                      |
| NMB0946 | 13 | peroxiredoxin 2 family protein-glutaredoxin                                               |
| NMB0947 | 10 | lipoamide dehydrogenase, putative                                                         |
| NMB0948 | 6  | succinate dehydrogenase, cytochrome b556 subunit ( sdhC )                                 |
| NMB0949 | 13 | succinate dehydrogenase, hydrophobic membrane anchor protein ( sdhD )                     |
| NMB0950 | 13 | succinate dehydrogenase, flavoprotein subunit ( sdhA )                                    |
| NMB0951 | 13 | succinate dehydrogenase, iron-sulfur protein ( sdhB )                                     |
| NMB0952 | 13 | conserved hypothetical protein                                                            |
| NMB0953 | 8  | hypothetical protein                                                                      |
| NMB0954 | 12 | citrate synthase ( gltA )                                                                 |
| NMB0956 | 13 | 2-oxoglutarate dehydrogenase, E2 component, dihydrolipoamide succinyltransferase ( sucB ) |
| NMB0957 | 13 | 2-oxoglutarate dehydrogenase, E3 component, lipoamide dehydrogenase ( lpd )               |
| NMB0958 | 13 | hypothetical protein                                                                      |

|         |    |                                                                                       |
|---------|----|---------------------------------------------------------------------------------------|
| NMB0959 | 13 | succinyl-CoA synthetase, beta subunit ( sucC )                                        |
| NMB0960 | 10 | succinyl-CoA synthetase, alpha subunit ( sucD )                                       |
| NMB0962 | 10 | excinuclease ABC, subunit A ( uvrA )                                                  |
| NMB0963 | 13 | phosphatidylserine decarboxylase precursor-related protein                            |
| NMB0964 | 11 | TonB-dependent receptor                                                               |
| NMB0965 | 12 | hypothetical protein                                                                  |
| NMB0966 | 12 | para-aminobenzoate synthase glutamine amidotransferase component II ( pabA )          |
| NMB0967 | 13 | anthranilate phosphoribosyltransferase ( trpD )                                       |
| NMB0969 | 9  | IS1016C2 transposase                                                                  |
| NMB0973 | 6  | putative integral membrane protein                                                    |
| NMB0977 | 10 | modulator of drug activity B (mdaB), putative                                         |
| NMB0978 | 13 | NAD(P) transhydrogenase, beta subunit ( pntB )                                        |
| NMB0979 | 12 | hypothetical protein                                                                  |
| NMB0980 | 10 | NAD(P) transhydrogenase, alpha subunit ( pntA )                                       |
| NMB0981 | 13 | phosphoserine phosphatase ( serB )                                                    |
| NMB0982 | 7  | chloride channel protein-related protein                                              |
| NMB0983 | 6  | phosphoribosylaminoimidazolecarboxamide formyltransferase-IMP cyclohydrolase ( purH ) |
| NMB0984 | 8  | transposase                                                                           |
| NMB0985 | 9  | E16-related protein                                                                   |
| NMB0986 | 6  | hypothetical protein                                                                  |
| NMB0987 | 6  | N-acetylmuramoyl-L-alanine amidase, putative                                          |
| NMB0988 | 7  | hypothetical protein                                                                  |
| NMB0989 | 9  | hypothetical protein                                                                  |
| NMB0990 | 11 | hypothetical protein                                                                  |
| NMB0991 | 13 | IS1106 transposase                                                                    |
| NMB0992 | 13 | adhesin                                                                               |
| NMB0993 | 13 | rubredoxin                                                                            |
| NMB0994 | 11 | acyl-CoA dehydrogenase family protein                                                 |
| NMB0995 | 12 | macrophage infectivity potentiator-related protein                                    |
| NMB0996 | 9  | hypothetical protein                                                                  |
| NMB0997 | 11 | D-lactate dehydrogenase ( dld )                                                       |
| NMB0998 | 11 | oxidoreductase, putative                                                              |
| NMB0999 | 8  | NifR3/SMM1 family protein                                                             |
| NMB1000 | 13 | IS1106 transposase                                                                    |
| NMB1002 | 12 | hypothetical protein                                                                  |
| NMB1003 | 9  | hypothetical protein                                                                  |
| NMB1004 | 3  | hypothetical protein                                                                  |
| NMB1005 | 3  | hypothetical protein                                                                  |
| NMB1009 | 5  | conserved hypothetical protein                                                        |
| NMB1012 | 11 | hypothetical protein                                                                  |
| NMB1013 | 12 | hypothetical protein                                                                  |
| NMB1016 | 12 | conserved hypothetical protein                                                        |
| NMB1017 | 7  | sulfate ABC transporter, periplasmic sulfate-binding protein ( sbp )                  |
| NMB1018 | 8  | conserved hypothetical protein                                                        |
| NMB1019 | 13 | phosphoribosylaminoimidazole carboxylase, ATPase subunit ( purK )                     |
| NMB1020 | 13 | hypothetical protein                                                                  |
| NMB1021 | 4  | anthranilate synthase component I ( trpE )                                            |
| NMB1023 | 13 | conserved hypothetical protein                                                        |
| NMB1024 | 13 | conserved hypothetical protein                                                        |
| NMB1025 | 3  | conserved hypothetical protein                                                        |
| NMB1026 | 13 | conserved hypothetical protein                                                        |
| NMB1027 | 11 | dnaJ protein ( dnaJ )                                                                 |
| NMB1028 | 12 | conserved hypothetical protein                                                        |
| NMB1029 | 13 | aspartate ammonia-lyase ( aspA )                                                      |
| NMB1030 | 13 | conserved hypothetical protein                                                        |
| NMB1031 | 13 | 3-isopropylmalate dehydrogenase ( leuB )                                              |
| NMB1032 | 12 | type II restriction enzyme NlaIV ( nlaIVR )                                           |
| NMB1034 | 13 | 3-isopropylmalate dehydratase, small subunit ( leuD )                                 |
| NMB1035 | 6  | hypothetical protein                                                                  |

|         |    |                                                       |
|---------|----|-------------------------------------------------------|
| NMB1036 | 3  | 3-isopropylmalate dehydratase, large subunit ( leuC ) |
| NMB1037 | 13 | glutamate--cysteine ligase ( gshA )                   |
| NMB1038 | 7  | DNA repair protein RadC ( radC )                      |
| NMB1039 | 7  | conserved hypothetical protein                        |
| NMB1040 | 13 | hypothetical protein                                  |
| NMB1041 | 9  | GTP-binding protein                                   |
| NMB1042 | 4  | cation transport ATPase, E1-E2 family                 |
| NMB1043 | 13 | hypothetical protein                                  |
| NMB1045 | 10 | hypothetical protein                                  |
| NMB1046 | 13 | threonine synthase ( thrC )                           |
| NMB1047 | 7  | hypothetical protein                                  |
| NMB1048 | 6  | hypothetical protein                                  |
| NMB1051 | 11 | ABC transporter, ATP-binding protein                  |
| NMB1052 | 3  | dedA protein ( dedA )                                 |
| NMB1054 | 13 | IS1106 transposase                                    |
| NMB1055 | 8  | serine hydroxymethyltransferase ( glyA )              |
| NMB1059 | 13 | conserved hypothetical protein                        |
| NMB1060 | 13 | fructose-1,6-bisphosphatase ( fbp )                   |
| NMB1061 | 12 | conserved hypothetical protein                        |
| NMB1062 | 12 | conserved hypothetical protein                        |
| NMB1063 | 13 | dihydroneopterin aldolase ( folB )                    |
| NMB1064 | 13 | conserved hypothetical protein                        |
| NMB1065 | 13 | crcB protein ( crcB )                                 |
| NMB1066 | 13 | hypothetical protein                                  |
| NMB1068 | 13 | gamma-glutamyl phosphate reductase ( proA )           |
| NMB1069 | 10 | glutamate 5-kinase ( proB )                           |
| NMB1070 | 13 | 2-isopropylmalate synthase ( leuA )                   |
| NMB1071 | 13 | conserved hypothetical protein                        |
| NMB1072 | 13 | prolipoprotein diacylglyceryl transferase ( lgt )     |
| NMB1073 | 9  | conserved hypothetical protein                        |
| NMB1074 | 13 | acetylglutamate kinase ( argB )                       |
| NMB1075 | 13 | conserved hypothetical protein                        |
| NMB1076 | 13 | DnaA-related protein                                  |
| NMB1077 | 12 | ABC transporter with multiple termination codons      |
| NMB1078 | 10 | transcriptional regulator, UmuD/LexA family           |
| NMB1079 | 3  | hypothetical protein                                  |
| NMB1080 | 3  | ner protein                                           |
| NMB1081 | 13 | bacteriophage transposase                             |
| NMB1082 | 5  | hypothetical protein                                  |
| NMB1083 | 13 | bacteriophage DNA transposition protein B, putative   |
| NMB1084 | 3  | hypothetical protein                                  |
| NMB1085 | 6  | N-acetylmuramoyl-L-alanine amidase, putative          |
| NMB1087 | 5  | hypothetical protein                                  |
| NMB1089 | 11 | hypothetical protein                                  |
| NMB1090 | 11 | hypothetical protein                                  |
| NMB1091 | 11 | hypothetical protein                                  |
| NMB1092 | 6  | hypothetical protein                                  |
| NMB1093 | 4  | hypothetical protein                                  |
| NMB1094 | 5  | hypothetical protein                                  |
| NMB1095 | 5  | conserved hypothetical protein                        |
| NMB1096 | 5  | conserved hypothetical protein                        |
| NMB1097 | 3  | cryptic Mu-phage G protein, putative                  |
| NMB1098 | 3  | I protein, putative                                   |
| NMB1100 | 3  | hypothetical protein                                  |
| NMB1102 | 4  | hypothetical protein                                  |
| NMB1103 | 4  | hypothetical protein                                  |
| NMB1104 | 3  | phage sheath protein                                  |
| NMB1105 | 3  | hypothetical protein                                  |
| NMB1110 | 5  | tail protein, 43 kDa                                  |

|         |    |                                                                                     |
|---------|----|-------------------------------------------------------------------------------------|
| NMB1111 | 6  | baseplate assembly protein V, putative                                              |
| NMB1112 | 4  | conserved hypothetical protein                                                      |
| NMB1113 | 4  | conserved hypothetical protein                                                      |
| NMB1114 | 3  | conserved hypothetical protein                                                      |
| NMB1115 | 13 | phage tail fibre gene                                                               |
| NMB1117 | 8  | hypothetical protein                                                                |
| NMB1118 | 2  | conserved hypothetical protein                                                      |
| NMB1119 | 6  | conserved hypothetical protein                                                      |
| NMB1120 | 4  | hypothetical protein                                                                |
| NMB1122 | 12 | ABC transporter, ATP-binding protein                                                |
| NMB1124 | 13 | hypothetical protein                                                                |
| NMB1125 | 10 | hypothetical protein                                                                |
| NMB1126 | 12 | hypothetical protein                                                                |
| NMB1127 | 9  | oxidoreductase, short chain dehydrogenase/reductase family                          |
| NMB1128 | 4  | conserved hypothetical protein                                                      |
| NMB1129 | 2  | hypothetical protein                                                                |
| NMB1130 | 13 | phytoene synthase, putative                                                         |
| NMB1131 | 13 | chaperone protein HscA ( hscA )                                                     |
| NMB1132 | 13 | hypothetical protein                                                                |
| NMB1133 | 12 | conserved hypothetical protein - ankyrin-related protein                            |
| NMB1134 | 12 | ferredoxin, 2Fe-2S type ( fdx )                                                     |
| NMB1136 | 12 | hypothetical protein                                                                |
| NMB1138 | 9  | conserved hypothetical protein                                                      |
| NMB1139 | 13 | acetyl-CoA carboxylase, carboxyl transferase alpha subunit ( accA )                 |
| NMB1140 | 13 | mesJ protein ( mesJ )                                                               |
| NMB1141 | 13 | RNA methyltransferase, TrmH family                                                  |
| NMB1142 | 13 | hypothetical protein                                                                |
| NMB1144 | 13 | hypothetical protein                                                                |
| NMB1145 | 9  | UDP-N-acetylmuramate:L-alanyl-gamma-D-glutamyl-meso-diaminopimelate ligase ( mpl )  |
| NMB1146 | 10 | biotin synthetase ( bioB )                                                          |
| NMB1147 | 13 | hypothetical protein                                                                |
| NMB1148 | 13 | hypothetical protein                                                                |
| NMB1149 | 13 | hypothetical protein                                                                |
| NMB1150 | 13 | dihydroxy-acid dehydratase ( ilvD )                                                 |
| NMB1151 | 9  | sulfite reductase hemoprotein, beta-component ( cysI )                              |
| NMB1152 | 9  | sulfite reductase (NADPH) flavoprotein, alpha component ( cysJ )                    |
| NMB1153 | 7  | sulfate adenylyltransferase, subunit 1                                              |
| NMB1154 | 3  | sulfate adenylyltransferase, subunit 2                                              |
| NMB1155 | 13 | phosphoadenosine phosphosulfate reductase                                           |
| NMB1156 | 9  | fusion product between siroheme synthase and sulphate adenylyltransferase subunit 1 |
| NMB1157 | 10 | hypothetical protein                                                                |
| NMB1158 | 13 | nickel-dependent hydrogenase, b-type cytochrome subunit                             |
| NMB1159 | 11 | conserved hypothetical protein                                                      |
| NMB1161 | 13 | hypothetical protein                                                                |
| NMB1162 | 13 | hypothetical protein                                                                |
| NMB1163 | 10 | hypothetical protein                                                                |
| NMB1164 | 12 | hypothetical protein                                                                |
| NMB1165 | 9  | oxidoreductase, short chain dehydrogenase/reductase family                          |
| NMB1166 | 4  | conserved hypothetical protein                                                      |
| NMB1167 | 3  | hypothetical protein                                                                |
| NMB1168 | 13 | phytoene synthase, putative                                                         |
| NMB1169 | 13 | chaperone protein HscA ( hscA )                                                     |
| NMB1170 | 13 | hypothetical protein                                                                |
| NMB1171 | 12 | conserved hypothetical protein - ankyrin-related protein                            |
| NMB1172 | 12 | ferredoxin, 2Fe-2S type ( fdx )                                                     |
| NMB1174 | 12 | hypothetical protein                                                                |
| NMB1176 | 9  | conserved hypothetical protein                                                      |
| NMB1177 | 13 | acetyl-CoA carboxylase, carboxyl transferase alpha subunit ( accA )                 |
| NMB1178 | 13 | mesJ protein ( mesJ )                                                               |



|         |    |                                                                                     |
|---------|----|-------------------------------------------------------------------------------------|
| NMB1179 | 13 | RNA methyltransferase, TrmH family                                                  |
| NMB1180 | 13 | hypothetical protein                                                                |
| NMB1182 | 13 | hypothetical protein                                                                |
| NMB1183 | 9  | UDP-N-acetylmuramate:L-alanyl-gamma-D-glutamyl-meso-diaminopimelate ligase ( mpl )  |
| NMB1184 | 10 | biotin synthetase ( bioB )                                                          |
| NMB1185 | 13 | hypothetical protein                                                                |
| NMB1186 | 13 | hypothetical protein                                                                |
| NMB1187 | 13 | hypothetical protein                                                                |
| NMB1188 | 13 | dihydroxy-acid dehydratase ( ilvD )                                                 |
| NMB1189 | 9  | sulfite reductase hemoprotein, beta-component ( cysI )                              |
| NMB1190 | 9  | sulfite reductase (NADPH) flavoprotein, alpha component ( cysJ )                    |
| NMB1191 | 7  | sulfate adenylyltransferase, subunit 1                                              |
| NMB1192 | 3  | sulfate adenylyltransferase, subunit 2                                              |
| NMB1193 | 13 | phosphoadenosine phosphosulfate reductase                                           |
| NMB1194 | 9  | fusion product between siroheme synthase and sulphate adenylyltransferase subunit 1 |
| NMB1195 | 10 | hypothetical protein                                                                |
| NMB1196 | 13 | nickel-dependent hydrogenase, b-type cytochrome subunit                             |
| NMB1197 | 11 | conserved hypothetical protein                                                      |
| NMB1199 | 12 | GTP-binding protein TypA ( typA )                                                   |
| NMB1200 | 13 | ribonuclease II family protein ( vacB )                                             |
| NMB1201 | 11 | IMP dehydrogenase ( guaB )                                                          |
| NMB1202 | 12 | hypothetical protein                                                                |
| NMB1203 | 6  | protein-PII uridylyltransferase ( glnD )                                            |
| NMB1204 | 8  | putative transcriptional regulator                                                  |
| NMB1205 | 13 | hypothetical protein                                                                |
| NMB1206 | 10 | bacterioferritin B ( bfrB )                                                         |
| NMB1207 | 13 | bacterioferritin A ( bfrA )                                                         |
| NMB1208 | 13 | hypothetical protein                                                                |
| NMB1209 | 8  | hypothetical protein                                                                |
| NMB1210 | 9  | toxin-activating protein, putative                                                  |
| NMB1211 | 13 | hypothetical protein                                                                |
| NMB1212 | 1  | hypothetical protein                                                                |
| NMB1213 | 11 | lipoprotein, putative                                                               |
| NMB1214 | 13 | hemagglutinin/hemolysin-related protein                                             |
| NMB1215 | 12 | hypothetical protein                                                                |
| NMB1216 | 13 | lipoic acid synthetase ( lipA )                                                     |
| NMB1217 | 7  | lipoate-protein ligase B ( lipB )                                                   |
| NMB1218 | 10 | conserved hypothetical protein                                                      |
| NMB1219 | 13 | transporter, putative                                                               |
| NMB1220 | 10 | stomatin/Mec-2 family protein                                                       |
| NMB1221 | 7  | hypothetical protein                                                                |
| NMB1222 | 9  | uracil-DNA glycosylase ( ung )                                                      |
| NMB1225 | 9  | hypothetical protein                                                                |
| NMB1226 | 7  | ABC transporter, ATP-binding protein                                                |
| NMB1228 | 10 | homoserine dehydrogenase ( metM )                                                   |
| NMB1229 | 13 | hypothetical protein                                                                |
| NMB1230 | 11 | DNA-binding protein HU-beta ( hupB )                                                |
| NMB1232 | 12 | conserved hypothetical protein                                                      |
| NMB1233 | 9  | exodeoxyribonuclease V, alpha subunit ( recD )                                      |
| NMB1234 | 7  | ABC transporter, ATP-binding protein                                                |
| NMB1234 | 7  | ABC transporter, ATP-binding protein                                                |
| NMB1235 | 13 | conserved hypothetical protein                                                      |
| NMB1236 | 13 | hypothetical protein                                                                |
| NMB1237 | 7  | recombination protein RecR ( recR )                                                 |
| NMB1238 | 13 | peptidyl-prolyl cis-trans isomerase-related protein                                 |
| NMB1239 | 13 | conserved hypothetical protein                                                      |
| NMB1240 | 10 | ABC transporter, ATP-binding protein                                                |
| NMB1241 | 8  | tRNA nucleotidyltransferase ( cca )                                                 |
| NMB1242 | 10 | hypothetical protein                                                                |

|         |    |                                                                                |
|---------|----|--------------------------------------------------------------------------------|
| NMB1243 | 8  | Holliday junction DNA helicase RuvB ( ruvB )                                   |
| NMB1244 | 11 | ribulose-phosphate 3-epimerase ( rpe )                                         |
| NMB1245 | 11 | hypothetical protein                                                           |
| NMB1246 | 13 | conserved hypothetical protein                                                 |
| NMB1247 | 13 | riboflavin synthase, alpha subunit ( ribE )                                    |
| NMB1248 | 7  | molybdopterin-guanine dinucleotide biosynthesis protein A ( mobA )             |
| NMB1249 | 12 | nitrate-nitrite sensory protein NarX, putative                                 |
| NMB1250 | 13 | transcriptional regulator, LuxR family                                         |
| NMB1252 | 5  | phosphoribosylformylglycinamide cyclo-ligase ( purM )                          |
| NMB1253 | 13 | hypothetical protein                                                           |
| NMB1254 | 13 | GTP cyclohydrolase II ( ribA )                                                 |
| NMB1255 | 11 | glycosyl transferase, degenerate                                               |
| NMB1256 | 7  | GTP cyclohydrolase II-3,4-dihydroxy-2-butanone-4-phosphate synthase ( ribA-B ) |
| NMB1257 | 13 | site-specific DNA methylase, degenerate                                        |
| NMB1258 | 13 | hypothetical protein                                                           |
| NMB1260 | 13 | type III restriction-modification system EcoPI enzyme, subunit res ( res )     |
| NMB1261 | 13 | Type III restriction system methylase                                          |
| NMB1262 | 10 | peptidyl-prolyl cis-trans isomerase                                            |
| NMB1263 | 13 | CobW-related protein                                                           |
| NMB1266 | 12 | zinc uptake regulation protein, putative ( zur )                               |
| NMB1267 | 13 | low molecular weight protein tyrosine-phosphatase                              |
| NMB1269 | 10 | hypothetical protein                                                           |
| NMB1270 | 13 | conserved hypothetical protein                                                 |
| NMB1271 | 13 | mercury transport periplasmic protein, putative                                |
| NMB1272 | 13 | hypothetical protein                                                           |
| NMB1273 | 12 | alginate O-acetylation protein AlgI, putative                                  |
| NMB1274 | 12 | hypothetical protein                                                           |
| NMB1275 | 10 | hypothetical protein                                                           |
| NMB1275 | 6  | hypothetical protein                                                           |
| NMB1276 | 7  | long-chain-fatty-acid--CoA ligase ( fadD-1 )                                   |
| NMB1277 | 13 | transporter, BCCT family                                                       |
| NMB1278 | 10 | site-specific recombinase ( gcr )                                              |
| NMB1279 | 13 | membrane-bound lytic murein transglycosylase B, putative                       |
| NMB1280 | 13 | very long chain acyl-CoA dehydrogenase-related protein                         |
| NMB1281 | 9  | transcription-repair coupling factor ( mfd )                                   |
| NMB1282 | 13 | aspartate 1-decarboxylase ( panD )                                             |
| NMB1283 | 6  | 2-dehydro-3-deoxyphosphooctonate aldolase ( kdsA )                             |
| NMB1284 | 13 | conserved hypothetical                                                         |
| NMB1285 | 13 | enolase ( eno )                                                                |
| NMB1287 | 9  | ferredoxin, putative                                                           |
| NMB1288 | 13 | ribonucleoside-diphosphate reductase, beta subunit ( nrdB )                    |
| NMB1291 | 13 | ribonucleoside-diphosphate reductase, alpha subunit ( nrdA )                   |
| NMB1292 | 13 | hypothetical protein                                                           |
| NMB1293 | 13 | hypothetical protein                                                           |
| NMB1294 | 9  | 1-acyl-sn-glycerol-3-phosphate acyltransferase ( plsC )                        |
| NMB1295 | 13 | formamidopyrimidine-DNA glycosylase ( mutM )                                   |
| NMB1296 | 7  | hypothetical protein                                                           |
| NMB1297 | 3  | membrane-bound lytic murein transglycosylase D                                 |
| NMB1298 | 10 | ribosomal small subunit pseudouridine synthase A ( rsuA )                      |
| NMB1299 | 10 | sodium dependent transporter                                                   |
| NMB1300 | 9  | cytidylate kinase ( cmk )                                                      |
| NMB1301 | 9  | 30S ribosomal protein S1 ( rpsA )                                              |
| NMB1302 | 4  | integration host factor, beta subunit ( himD )                                 |
| NMB1303 | 13 | transcriptional regulator, MerR family                                         |
| NMB1304 | 11 | alcohol dehydrogenase, class III ( adhC )                                      |
| NMB1305 | 8  | esterase ( esd )                                                               |
| NMB1306 | 6  | conserved hypothetical protein                                                 |
| NMB1307 | 13 | nucleoside diphosphate kinase ( ndk )                                          |
| NMB1308 | 8  | conserved hypothetical protein                                                 |

|         |    |                                                                                   |
|---------|----|-----------------------------------------------------------------------------------|
| NMB1309 | 13 | fimbrial biogenesis and twitching motility protein, putative                      |
| NMB1310 | 13 | gcpE protein ( gcpE )                                                             |
| NMB1312 | 12 | ATP-dependent Clp protease, proteolytic subunit ( clpP )                          |
| NMB1313 | 13 | trigger factor ( tig )                                                            |
| NMB1314 | 4  | cell division protein FtsK ( ftsK-2 )                                             |
| NMB1315 | 8  | uracil permease ( uraA )                                                          |
| NMB1316 | 9  | hypothetical protein                                                              |
| NMB1317 | 6  | hypothetical protein                                                              |
| NMB1318 | 13 | CDP-diacylglycerol--serine O-phosphatidyltransferase ( pssA )                     |
| NMB1319 | 7  | conserved hypothetical protein                                                    |
| NMB1320 | 6  | 50S ribosomal protein L9 ( rplI )                                                 |
| NMB1321 | 13 | 30S ribosomal protein S18 ( rpsR )                                                |
| NMB1322 | 13 | primosomal replication protein n, putative                                        |
| NMB1323 | 13 | 30S ribosomal protein S6 ( rpsF )                                                 |
| NMB1324 | 12 | thioredoxin reductase ( trxB )                                                    |
| NMB1325 | 13 | cation transport ATPase, E1-E2 family                                             |
| NMB1326 | 10 | excinuclease ABC, subunit C ( uvrC )                                              |
| NMB1327 | 1  | conserved hypothetical protein                                                    |
| NMB1328 | 13 | conserved hypothetical protein                                                    |
| NMB1331 | 13 | excinuclease ABC, subunit B ( uvrB )                                              |
| NMB1332 | 13 | carboxy-terminal peptidase ( prc )                                                |
| NMB1333 | 12 | conserved hypothetical protein                                                    |
| NMB1334 | 5  | hypothetical protein                                                              |
| NMB1335 | 13 | creA protein ( creA )                                                             |
| NMB1336 | 8  | conserved hypothetical protein                                                    |
| NMB1337 | 8  | conserved hypothetical protein                                                    |
| NMB1338 | 13 | isomerase, putative                                                               |
| NMB1339 | 10 | prolyl-tRNA synthetase ( proS )                                                   |
| NMB1340 | 5  | hypothetical protein                                                              |
| NMB1341 | 13 | pyruvate dehydrogenase, E1 component ( pdhA )                                     |
| NMB1342 | 12 | pyruvate dehydrogenase, E2 component, dihydrolipoamide acetyltransferase ( pdhB ) |
| NMB1344 | 10 | pyruvate dehydrogenase, E3 component, lipoamide dehydrogenase ( lpdA )            |
| NMB1345 | 13 | hypothetical protein                                                              |
| NMB1346 | 10 | dead TonB-dependent receptor                                                      |
| NMB1347 | 13 | extragenic suppressor protein SuhB ( suhB )                                       |
| NMB1348 | 13 | RNA methylase, putative                                                           |
| NMB1349 | 13 | hypothetical protein                                                              |
| NMB1351 | 13 | fmv and fmv protein, putative                                                     |
| NMB1352 | 13 | hypothetical protein                                                              |
| NMB1353 | 12 | aldehyde dehydrogenase family protein                                             |
| NMB1354 | 13 | conserved hypothetical protein                                                    |
| NMB1355 | 12 | glutamyl-tRNA (Gln) amidotransferase subunit C, putative ( gatC )                 |
| NMB1356 | 13 | Glu-tRNA(Gln) amidotransferase, subunit A ( gatA )                                |
| NMB1357 | 13 | conserved hypothetical protein                                                    |
| NMB1358 | 9  | Glu-tRNA(Gln) amidotransferase, subunit B ( gatB )                                |
| NMB1359 | 13 | CDP-6-deoxy-delta-3,4-glucoseen reductase, putative                               |
| NMB1360 | 13 | pyridoxamine 5-phosphate oxidase ( pdxH )                                         |
| NMB1361 | 13 | conserved hypothetical protein                                                    |
| NMB1362 | 12 | oxalate/formate antiporter, putative                                              |
| NMB1363 | 12 | exodeoxyribonuclease, large subunit ( xseA )                                      |
| NMB1364 | 12 | NH(3)-dependent NAD <sup>+</sup> synthetase NadE, putative                        |
| NMB1365 | 12 | conserved hypothetical protein                                                    |
| NMB1366 | 13 | thioredoxin                                                                       |
| NMB1367 | 12 | conserved hypothetical protein                                                    |
| NMB1368 | 3  | ATP-dependent RNA helicase, putative                                              |
| NMB1369 | 12 | hypothetical protein                                                              |
| NMB1370 | 12 | hypothetical protein                                                              |
| NMB1371 | 12 | acetylornithine aminotransferase ( argD )                                         |
| NMB1372 | 13 | ATP-dependent Clp protease, ATP-binding subunit ClpX ( clpX )                     |

|         |    |                                                                                     |
|---------|----|-------------------------------------------------------------------------------------|
| NMB1373 | 13 | ribosome-binding factor A ( rbfA )                                                  |
| NMB1374 | 12 | tRNA pseudouridine synthase B ( truB )                                              |
| NMB1375 | 13 | Restriction system methylase                                                        |
| NMB1376 | 11 | Type III restriction - modification system enzyme                                   |
| NMB1377 | 13 | L-lactate dehydrogenase ( lldD )                                                    |
| NMB1378 | 8  | conserved hypothetical protein                                                      |
| NMB1380 | 13 | nifU protein                                                                        |
| NMB1381 | 12 | HesB-YadR-YfhF family protein                                                       |
| NMB1382 | 12 | conserved hypothetical protein                                                      |
| NMB1383 | 10 | chaperone protein HscB ( hscB )                                                     |
| NMB1384 | 13 | DNA gyrase subunit A ( gyrA )                                                       |
| NMB1385 | 13 | IS1016 family transposase                                                           |
| NMB1387 | 10 | hypothetical protein                                                                |
| NMB1388 | 12 | glucose-6-phosphate isomerase ( pgi-2 )                                             |
| NMB1389 | 13 | RpiR/YebK/YfhH family protein / transcriptional regulator                           |
| NMB1390 | 13 | glucokinase ( glk )                                                                 |
| NMB1391 | 11 | oxidoreductase, Sol/DevB family                                                     |
| NMB1392 | 13 | glucose-6-phosphate 1-dehydrogenase ( zwf )                                         |
| NMB1393 | 13 | phosphogluconate dehydratase ( edd )                                                |
| NMB1394 | 7  | 4-hydroxy-2-oxoglutarate aldolase-2-deydro-3-deoxyphosphogluconate aldolase ( eda ) |
| NMB1395 | 13 | alcohol dehydrogenase, zinc-containing                                              |
| NMB1396 | 13 | A-G-specific adenine glycosylase ( mutY )                                           |
| NMB1397 | 10 | hypothetical protein                                                                |
| NMB1399 | 13 | IS1106 transposase                                                                  |
| NMB1401 | 13 | IS1016 transposase                                                                  |
| NMB1411 | 13 | IS1016 transposase                                                                  |
| NMB1412 | 10 | FrpC operon protein                                                                 |
| NMB1413 | 13 | IS1016 family transposase                                                           |
| NMB1414 | 10 | FrpC operon protein                                                                 |
| NMB1416 | 12 | aminopeptidase N ( pepN )                                                           |
| NMB1417 | 13 | conserved hypothetical protein                                                      |
| NMB1418 | 13 | HtrB/MsbB family protein                                                            |
| NMB1419 | 13 | crossover junction endodeoxyribonuclease RuvC ( ruvC )                              |
| NMB1420 | 9  | factor-for-inversion stimulation protein Fis, putative                              |
| NMB1421 | 11 | nifR3 protein                                                                       |
| NMB1422 | 12 | ATP-dependent RNA helicase, putative                                                |
| NMB1423 | 13 | conserved hypothetical protein                                                      |
| NMB1425 | 12 | lysyl-tRNA synthetase, heat inducible ( lysU )                                      |
| NMB1426 | 13 | hypothetical protein                                                                |
| NMB1428 | 10 | aminopeptidase, putative                                                            |
| NMB1430 | 6  | transcription elongation factor GreA ( greA )                                       |
| NMB1431 | 8  | hypothetical protein                                                                |
| NMB1432 | 6  | 3-phosphoshikimate 1-carboxyvinyltransferase ( aroA )                               |
| NMB1433 | 9  | conserved hypothetical protein                                                      |
| NMB1434 | 1  | cardiolipin synthetase family protein                                               |
| NMB1435 | 3  | drug resistance translocase family protein                                          |
| NMB1436 | 12 | conserved hypothetical protein                                                      |
| NMB1437 | 13 | conserved hypothetical protein                                                      |
| NMB1438 | 9  | conserved hypothetical protein                                                      |
| NMB1439 | 6  | phosphoribosylaminoimidazole carboxylase, catalytic subunit ( purE )                |
| NMB1440 | 10 | hypothetical protein                                                                |
| NMB1441 | 9  | O-methyltransferase, putative                                                       |
| NMB1442 | 7  | mismatch repair protein MutL ( mutL )                                               |
| NMB1443 | 6  | DNA polymerase III, subunits gamma and tau ( dnaX )                                 |
| NMB1444 | 13 | conserved hypothetical protein                                                      |
| NMB1445 | 13 | recA protein ( recA )                                                               |
| NMB1446 | 12 | 3-dehydroquinate dehydratase ( aroD )                                               |
| NMB1447 | 1  | ATP-dependent DNA helicase Rep ( rep )                                              |
| NMB1448 | 13 | DNA-damage-inducible protein P ( dinP )                                             |

|         |    |                                                                    |
|---------|----|--------------------------------------------------------------------|
| NMB1449 | 13 | TonB-dependent receptor, authentic point mutation                  |
| NMB1450 | 13 | ferredoxin--NADP reductase ( fpr-2 )                               |
| NMB1451 | 13 | DNA polymerase III, epsilon subunit ( dnaQ-1 )                     |
| NMB1452 | 13 | conserved hypothetical protein                                     |
| NMB1453 | 12 | hypothetical protein                                               |
| NMB1454 | 13 | ferredoxin, 4Fe-4S bacterial type                                  |
| NMB1455 | 13 | hypothetical protein                                               |
| NMB1456 | 12 | hypothetical protein                                               |
| NMB1457 | 13 | transketolase ( tktA )                                             |
| NMB1458 | 12 | fumarate hydratase, class II ( fumC )                              |
| NMB1459 | 13 | conserved hypothetical protein                                     |
| NMB1460 | 12 | single-strand binding protein ( ssb )                              |
| NMB1461 | 8  | probable MFS family transporter protein                            |
| NMB1462 | 12 | transglycosylase, putative                                         |
| NMB1465 | 13 | opacity protein ( opa )                                            |
| NMB1466 | 13 | conserved hypothetical protein                                     |
| NMB1467 | 12 | exopolyphosphatase ( ppx )                                         |
| NMB1468 | 13 | hypothetical protein                                               |
| NMB1469 | 2  | hypothetical protein                                               |
| NMB1470 | 13 | hypothetical protein                                               |
| NMB1471 | 13 | tryptophanyl-tRNA synthetase ( trpS )                              |
| NMB1472 | 11 | clpB protein ( clpB )                                              |
| NMB1473 | 13 | aminotransferase, class I                                          |
| NMB1474 | 13 | 4-oxalocrotonate tautomerase, putative                             |
| NMB1476 | 13 | glutamate dehydrogenase, NAD-specific ( gluD )                     |
| NMB1477 | 13 | hypothetical protein                                               |
| NMB1478 | 12 | phosphoglycolate phosphatase ( gph )                               |
| NMB1479 | 9  | regulatory protein RecX ( recX )                                   |
| NMB1480 | 5  | hypothetical protein                                               |
| NMB1482 | 13 | acyl CoA thioester hydrolase family protein                        |
| NMB1483 | 13 | lipoprotein NlpD, putative                                         |
| NMB1484 | 13 | stationary-phase survival protein SurE                             |
| NMB1485 | 13 | conserved hypothetical protein                                     |
| NMB1487 | 10 | fimbrial assembly protein ( fimB )                                 |
| NMB1488 | 13 | succinate-semialdehyde dehydrogenase (NADP <sup>+</sup> ) ( gabD ) |
| NMB1489 | 10 | hypothetical protein                                               |
| NMB1491 | 11 | hypothetical protein                                               |
| NMB1492 | 9  | hypothetical protein                                               |
| NMB1493 | 13 | carbon starvation protein A ( cstA )                               |
| NMB1494 | 13 | conserved hypothetical protein                                     |
| NMB1496 | 12 | conserved hypothetical protein                                     |
| NMB1497 | 12 | TonB-dependent receptor                                            |
| NMB1498 | 6  | aspartokinase, alpha and beta subunits ( lysC )                    |
| NMB1499 | 5  | ribonuclease PH ( rph )                                            |
| NMB1500 | 8  | conserved hypothetical protein                                     |
| NMB1501 | 4  | HesA/MoeB/ThiF family protein                                      |
| NMB1502 | 13 | hypothetical protein                                               |
| NMB1503 | 13 | hypothetical protein                                               |
| NMB1504 | 12 | conserved hypothetical protein                                     |
| NMB1505 | 11 | nicotinate phosphoribosyltransferase ( pncB )                      |
| NMB1506 | 10 | arginyl-tRNA synthetase ( argS )                                   |
| NMB1507 | 9  | hypothetical protein                                               |
| NMB1508 | 8  | hypothetical protein                                               |
| NMB1509 | 6  | amino acid ABC transporter, permease protein                       |
| NMB1510 | 2  | thermonuclease family protein                                      |
| NMB1511 | 13 | ribose 5-phosphate isomerase A ( rpiA )                            |
| NMB1512 | 8  | YgbB-YacN family protein                                           |
| NMB1513 | 1  | conserved hypothetical protein                                     |
| NMB1514 | 6  | DNA polymerase III, epsilon subunit ( dnaQ-2 )                     |

|         |    |                                                                       |
|---------|----|-----------------------------------------------------------------------|
| NMB1515 | 12 | transporter, putative                                                 |
| NMB1516 | 12 | fixS protein ( fixS )                                                 |
| NMB1517 | 8  | hypothetical protein                                                  |
| NMB1518 | 7  | acetate kinase ( ackA-2 )                                             |
| NMB1519 | 9  | thiol:disulfide interchange protein DsbD ( dsbD )                     |
| NMB1520 | 13 | hypothetical protein                                                  |
| NMB1521 | 1  | phytoene synthase-related protein                                     |
| NMB1522 | 10 | FKBP-type peptidyl-prolyl cis-trans isomerase SlyD ( slyD )           |
| NMB1523 | 2  | Lip / H8 outer membrane protein                                       |
| NMB1524 | 13 | oxidoreductase, putative                                              |
| NMB1526 | 13 | small major protein B                                                 |
| NMB1527 | 6  | ADP-heptose--LPS heptosyltransferase II ( rfaF )                      |
| NMB1528 | 7  | methylated-DNA--protein-cysteine methyltransferase, putative          |
| NMB1529 | 8  | dead hypothetical protein                                             |
| NMB1530 | 8  | succinyl-diaminopimelate desuccinylase ( dapE )                       |
| NMB1531 | 9  | conserved hypothetical protein                                        |
| NMB1532 | 9  | conserved hypothetical protein                                        |
| NMB1533 | 12 | H.8 outer membrane protein/ azurin like protein                       |
| NMB1534 | 13 | hypothetical protein                                                  |
| NMB1535 | 13 | hypothetical protein                                                  |
| NMB1536 | 4  | preprotein translocase SecA subunit ( secA )                          |
| NMB1537 | 6  | DNA primase ( dnaG )                                                  |
| NMB1538 | 6  | RNA polymerase sigma factor RpoD ( rpoD )                             |
| NMB1539 | 13 | IS1106 transposase                                                    |
| NMB1540 | 7  | lactoferrin-binding protein A ( lbpA )                                |
| NMB1541 | 10 | lactoferrin-binding protein B                                         |
| NMB1549 | 5  | hypothetical protein                                                  |
| NMB1553 | 9  | IS1106 related transposase                                            |
| NMB1554 | 13 | CTP synthase ( pyrG )                                                 |
| NMB1555 | 13 | long-chain-fatty-acid--CoA ligase ( fadD-2 )                          |
| NMB1556 | 11 | tRNA (5-methylaminomethyl-2-thiouridylate)-methyltransferase ( trmU ) |
| NMB1557 | 11 | conserved hypothetical protein                                        |
| NMB1558 | 10 | diacylglycerol kinase ( dgkA )                                        |
| NMB1559 | 13 | glutathione synthetase ( gshB )                                       |
| NMB1560 | 12 | glutaminyl-tRNA synthetase ( glnS )                                   |
| NMB1561 | 13 | transcriptional regulator, DeoR family                                |
| NMB1562 | 9  | conserved hypothetical protein                                        |
| NMB1563 | 9  | transcriptional regulator, GntR family                                |
| NMB1564 | 12 | conserved hypothetical protein                                        |
| NMB1565 | 12 | hypothetical protein                                                  |
| NMB1566 | 13 | phosphoribosylglycinamide formyltransferase ( purN )                  |
| NMB1567 | 13 | macrophage infectivity potentiator                                    |
| NMB1568 | 13 | DNA polymerase holoenzyme chi subunit, putative                       |
| NMB1569 | 12 | aminopeptidase A-I ( pepA )                                           |
| NMB1570 | 12 | conserved hypothetical protein                                        |
| NMB1571 | 10 | conserved hypothetical protein                                        |
| NMB1572 | 13 | aconitate hydratase 2 ( acnB )                                        |
| NMB1573 | 10 | ornithine carbamoyltransferase, catabolic ( argF )                    |
| NMB1574 | 13 | ketol-acid reductoisomerase ( ilvC )                                  |
| NMB1575 | 12 | conserved hypothetical protein                                        |
| NMB1576 | 13 | acetolactate synthase III, small subunit ( ilvH )                     |
| NMB1577 | 11 | acetolactate synthase III, large subunit ( ilvI )                     |
| NMB1578 | 8  | conserved hypothetical protein                                        |
| NMB1579 | 11 | ATP phosphoribosyltransferase ( hisG )                                |
| NMB1580 | 13 | hypothetical protein                                                  |
| NMB1581 | 4  | histidinol dehydrogenase ( hisD )                                     |
| NMB1582 | 12 | histidinol-phosphate aminotransferase ( hisC )                        |
| NMB1583 | 13 | imidazoleglycerol-phosphate dehydratase ( hisB )                      |
| NMB1584 | 9  | 3-hydroxyacid dehydrogenase                                           |

|         |    |                                                                                                     |
|---------|----|-----------------------------------------------------------------------------------------------------|
| NMB1587 | 13 | protease, putative                                                                                  |
| NMB1588 | 12 | CDP-diacylglycerol--glycerol-3-phosphate 3-phosphatidyltransferase ( pgsA )                         |
| NMB1589 | 12 | hypothetical protein                                                                                |
| NMB1591 | 7  | transcriptional regulator MtrA ( mtrA )                                                             |
| NMB1592 | 12 | hypothetical protein                                                                                |
| NMB1593 | 13 | conserved hypothetical protein                                                                      |
| NMB1594 | 12 | spermidine-putrescine ABC transporter, periplasmic spermidine-putrescine-binding protein ( potD-3 ) |
| NMB1595 | 13 | alanyl-tRNA synthetase ( alaS )                                                                     |
| NMB1600 | 3  | hypothetical protein                                                                                |
| NMB1601 | 13 | IS1106 transposase                                                                                  |
| NMB1602 | 8  | transposase                                                                                         |
| NMB1604 | 4  | phosphoglycerate mutase ( gpm )                                                                     |
| NMB1605 | 2  | topoisomerase IV subunit A ( parC )                                                                 |
| NMB1606 | 7  | sensor histidine kinase                                                                             |
| NMB1607 | 9  | sigma-54 dependent response regulator                                                               |
| NMB1608 | 13 | conserved hypothetical protein                                                                      |
| NMB1609 | 10 | trans-sulfuration enzyme family protein                                                             |
| NMB1610 | 13 | hypothetical protein                                                                                |
| NMB1611 | 8  | hypothetical protein                                                                                |
| NMB1612 | 10 | amino acid ABC transporter, periplasmic amino acid-binding protein                                  |
| NMB1613 | 9  | fumarate hydratase, class I ( fumB )                                                                |
| NMB1614 | 12 | Trk system potassium uptake protein TrkA ( trkA )                                                   |
| NMB1615 | 7  | hypothetical protein                                                                                |
| NMB1616 | 9  | phosphomethylpyrimidine kinase ( thiD )                                                             |
| NMB1617 | 7  | tellurite resistance protein, putative                                                              |
| NMB1618 | 7  | ribonuclease HI ( rnhA )                                                                            |
| NMB1619 | 7  | conserved hypothetical protein                                                                      |
| NMB1620 | 13 | conserved hypothetical protein                                                                      |
| NMB1622 | 12 | nitric oxide reductase ( norB )                                                                     |
| NMB1623 | 10 | major anaerobically induced outer membrane protein ( panI )                                         |
| NMB1624 | 9  | conserved hypothetical protein                                                                      |
| NMB1628 | 4  | tspB                                                                                                |
| NMB1636 | 13 | opacity protein ( opa )                                                                             |
| NMB1637 | 12 | conserved hypothetical protein                                                                      |
| NMB1638 | 10 | YhbX-YhjW-YijP-YjdB family protein                                                                  |
| NMB1639 | 10 | hypothetical protein                                                                                |
| NMB1640 | 13 | phosphoserine aminotransferase ( serC )                                                             |
| NMB1641 | 13 | conserved hypothetical protein                                                                      |
| NMB1642 | 12 | N utilization substance protein A ( nusA )                                                          |
| NMB1643 | 13 | translation initiation factor IF-2 ( infB )                                                         |
| NMB1644 | 6  | hypothetical protein                                                                                |
| NMB1645 | 7  | hypothetical protein                                                                                |
| NMB1647 | 10 | amino acid symporter, putative                                                                      |
| NMB1648 | 7  | conserved hypothetical protein                                                                      |
| NMB1649 | 7  | disulfide bond formation protein B ( dsbB )                                                         |
| NMB1650 | 10 | leucine-responsive regulatory protein ( lrp )                                                       |
| NMB1651 | 13 | alanine racemase ( alr )                                                                            |
| NMB1652 | 7  | conserved hypothetical protein                                                                      |
| NMB1653 | 13 | conserved hypothetical protein                                                                      |
| NMB1654 | 5  | conserved hypothetical protein                                                                      |
| NMB1655 | 13 | adenine specific methylase, putative                                                                |
| NMB1657 | 13 | putative DNA transport competence protein                                                           |
| NMB1658 | 13 | DNA/pantothenate metabolism flavoprotein ( dfp )                                                    |
| NMB1659 | 9  | guanosine-3',5'-bis(diphosphate) 3'-pyrophosphohydrolase ( spoT )                                   |
| NMB1660 | 13 | DNA-directed RNA polymerase, omega subunit ( rpoZ )                                                 |
| NMB1661 | 12 | guanylate kinase ( gmk )                                                                            |
| NMB1662 | 13 | adenine phosphoribosyltransferase ( apt )                                                           |
| NMB1663 | 13 | conserved hypothetical protein                                                                      |
| NMB1664 | 13 | protease, putative                                                                                  |

|         |    |                                                               |
|---------|----|---------------------------------------------------------------|
| NMB1665 | 13 | conserved hypothetical protein                                |
| NMB1666 | 13 | hypothetical protein                                          |
| NMB1667 | 13 | hypothetical protein                                          |
| NMB1669 | 10 | iron-starvation protein PgiA                                  |
| NMB1670 | 12 | PqiA family protein                                           |
| NMB1671 | 12 | pqiB protein ( pqiB )                                         |
| NMB1672 | 13 | conserved hypothetical protein                                |
| NMB1673 | 13 | DNA-3-methyladenine glycosylase I, putative                   |
| NMB1674 | 13 | GDSL lipase family protein                                    |
| NMB1676 | 12 | glycine dehydrogenase (decarboxylating) ( gcvP )              |
| NMB1677 | 12 | cytochrome c5                                                 |
| NMB1678 | 12 | aromatic-amino-acid aminotransferase ( tyrB )                 |
| NMB1679 | 13 | tRNA (uracil-5-)-methyltransferase ( trmA )                   |
| NMB1680 | 9  | chorismate synthase ( aroC )                                  |
| NMB1681 | 9  | hypothetical protein                                          |
| NMB1682 | 8  | topoisomerase IV subunit B ( parE )                           |
| NMB1683 | 7  | MutT-nudix family protein                                     |
| NMB1684 | 13 | seryl-tRNA synthetase ( serS )                                |
| NMB1685 | 10 | D-lactate dehydrogenase ( ldhA )                              |
| NMB1686 | 9  | peptide chain release factor 1 ( prfA )                       |
| NMB1687 | 5  | conserved hypothetical protein                                |
| NMB1688 | 11 | L-asparaginase I ( ansA )                                     |
| NMB1689 | 9  | dedA protein, putative                                        |
| NMB1690 | 6  | phosphoglucomutase-phosphomannomutase family protein ( mrsA ) |
| NMB1691 | 11 | dihydropteroate synthase ( folP )                             |
| NMB1693 | 12 | hypothetical protein                                          |
| NMB1694 | 12 | conserved hypothetical protein                                |
| NMB1695 | 12 | hypothetical protein                                          |
| NMB1696 | 10 | acyl carrier protein                                          |
| NMB1697 | 5  | acyl carrier protein, putative                                |
| NMB1698 | 13 | acyltransferase, putative                                     |
| NMB1699 | 12 | hypothetical protein                                          |
| NMB1700 | 9  | hypothetical protein                                          |
| NMB1701 | 1  | hypothetical protein                                          |
| NMB1702 | 10 | 3-oxoacyl-(acyl-carrier-protein) reductase ( fabG-1 )         |
| NMB1703 | 13 | 3-oxoacyl-(acyl-carrier-protein) synthase II ( fabF-2 )       |
| NMB1704 | 6  | beta-1,4-glucosyltransferase ( lgtF )                         |
| NMB1705 | 3  | alpha-1,2-N-acetylglucosamine transferase ( rfaK )            |
| NMB1706 | 13 | hypothetical protein                                          |
| NMB1707 | 11 | sodium- and chloride-dependent transporter                    |
| NMB1708 | 7  | hypothetical protein                                          |
| NMB1709 | 9  | thymidylate synthase ( thyA )                                 |
| NMB1710 | 13 | glutamate dehydrogenase, NADP-specific ( gdhA )               |
| NMB1711 | 12 | transcriptional regulator, GntR family                        |
| NMB1714 | 13 | multidrug efflux pump channel protein ( mtrE )                |
| NMB1715 | 12 | multiple transferable resistance system protein MtrD ( mtrD ) |
| NMB1716 | 3  | membrane fusion protein ( mtrC )                              |
| NMB1717 | 13 | transcriptional regulator MtrR ( mtrR )                       |
| NMB1718 | 8  | hypothetical protein                                          |
| NMB1719 | 3  | efflux pump component MtrF ( mtrF )                           |
| NMB1720 | 9  | exodeoxyribonuclease V 125 kD polypeptide ( recC )            |
| NMB1721 | 10 | conserved hypothetical protein                                |
| NMB1722 | 12 | cytochrome C555, truncation                                   |
| NMB1723 | 13 | cytochrome c oxidase, subunit III ( fixP )                    |
| NMB1724 | 10 | cytochrome c oxidase, subunit II ( fixO )                     |
| NMB1725 | 13 | cytochrome c oxidase, subunit I ( fixN )                      |
| NMB1726 | 13 | conserved hypothetical protein                                |
| NMB1727 | 13 | conserved hypothetical protein                                |
| NMB1728 | 13 | biopolymer transport protein ExbD ( exbD )                    |



|         |    |                                                |
|---------|----|------------------------------------------------|
| NMB1729 | 11 | biopolymer transport protein ExbB ( exbB )     |
| NMB1730 | 11 | TonB protein ( tonB )                          |
| NMB1731 | 3  | conserved hypothetical protein                 |
| NMB1734 | 13 | glutaredoxin ( grx )                           |
| NMB1735 | 10 | GTP pyrophosphokinase ( relA )                 |
| NMB1739 | 11 | hypothetical protein                           |
| NMB1744 | 6  | putative integral membrane protein             |
| NMB1747 | 4  | TspB                                           |
| NMB1750 | 6  | pilin gene inverting protein PivNM-2           |
| NMB1752 | 13 | conserved hypothetical protein                 |
| NMB1753 | 13 | VapD-related protein                           |
| NMB1754 | 7  | cryptic plasmid protein A-related protein,     |
| NMB1755 | 11 | hypothetical protein                           |
| NMB1756 | 12 | hypothetical protein                           |
| NMB1757 | 12 | hypothetical protein                           |
| NMB1759 | 11 | conserved hypothetical protein                 |
| NMB1760 | 8  | conserved hypothetical protein                 |
| NMB1761 | 12 | conserved hypothetical protein                 |
| NMB1762 | 13 | hemolysin activation protein HecB, putative    |
| NMB1763 | 13 | toxin-activating protein, putative             |
| NMB1764 | 7  | hypothetical protein                           |
| NMB1766 | 12 | hypothetical protein                           |
| NMB1767 | 5  | hypothetical protein                           |
| NMB1768 | 5  | hemagglutinin/hemolysin-related protein        |
| NMB1769 | 9  | IS1016C2 transposase                           |
| NMB1777 | 1  | hypothetical protein                           |
| NMB1785 | 8  | hypothetical protein                           |
| NMB1788 | 12 | ATP-dependent DNA helicase RecG ( recG )       |
| NMB1789 | 10 | protein-export protein SecB ( secB )           |
| NMB1790 | 9  | glutaredoxin 3 ( grxC )                        |
| NMB1791 | 12 | cytoplasmic axial filament protein ( cafA )    |
| NMB1796 | 2  | conserved hypothetical protein                 |
| NMB1797 | 4  | penicillin-binding protein 3                   |
| NMB1798 | 13 | IS1016 family transposase                      |
| NMB1799 | 10 | S-adenosylmethionine synthetase ( metK )       |
| NMB1800 | 2  | hypothetical protein                           |
| NMB1802 | 13 | O-sialoglycoprotein endopeptidase ( gcp )      |
| NMB1803 | 10 | cytochrome c-type biogenesis protein, putative |
| NMB1804 | 12 | cytochrome c-type biogenesis protein, putative |
| NMB1805 | 1  | cytochrome c4                                  |
| NMB1806 | 13 | conserved hypothetical protein                 |
| NMB1808 | 8  | pilM protein ( pilM )                          |
| NMB1810 | 9  | pilO protein ( PilO )                          |
| NMB1811 | 13 | pilP protein ( pilP )                          |
| NMB1812 | 10 | pilQ protein ( pilQ )                          |
| NMB1814 | 8  | 3-dehydroquinate synthase ( aroB )             |
| NMB1815 | 2  | conserved hypothetical protein                 |
| NMB1816 | 6  | conserved hypothetical protein                 |
| NMB1817 | 8  | riboflavin-specific deaminase ( ribD )         |
| NMB1819 | 13 | hypothetical protein                           |
| NMB1820 | 6  | pilin glycosylation protein PglB ( pglB )      |
| NMB1821 | 6  | pilin glycosylation protein PglC ( pglC )      |
| NMB1823 | 7  | valine--pyruvate aminotransferase ( avtA )     |
| NMB1824 | 7  | conserved hypothetical protein                 |
| NMB1825 | 13 | hypothetical protein                           |
| NMB1826 | 2  | conserved hypothetical protein                 |
| NMB1827 | 9  | DNA polymerase III, alpha subunit ( dnaE )     |
| NMB1828 | 12 | conserved hypothetical protein                 |
| NMB1829 | 11 | TonB dependent receptor                        |

|         |    |                                                                  |
|---------|----|------------------------------------------------------------------|
| NMB1830 | 2  | phosphoglycolate phosphatase, putative                           |
| NMB1831 | 13 | lytB protein ( lytB )                                            |
| NMB1832 | 11 | lipoprotein signal peptidase ( lspA )                            |
| NMB1833 | 9  | isoleucyl-tRNA synthetase ( ileS )                               |
| NMB1834 | 12 | riboflavin kinase/FMN adenylyltransferase ( ribF )               |
| NMB1835 | 8  | tyrosyl-tRNA synthetase ( tyrS )                                 |
| NMB1836 | 10 | lipopolysaccharide biosynthesis protein WbpC, putative           |
| NMB1837 | 13 | hypothetical protein                                             |
| NMB1838 | 13 | GTP-binding protein, putative                                    |
| NMB1839 | 13 | formate--tetrahydrofolate ligase ( fhs )                         |
| NMB1840 | 13 | conserved hypothetical protein                                   |
| NMB1841 | 13 | mannose-1-phosphate guanylyltransferase-related protein          |
| NMB1842 | 13 | 4-hydroxyphenylacetate 3-hydroxylase, small subunit, putative    |
| NMB1843 | 13 | transcriptional regulator, MarR family                           |
| NMB1845 | 13 | thioredoxin                                                      |
| NMB1846 | 12 | Mrp-NBP35 family protein                                         |
| NMB1848 | 13 | hypothetical protein                                             |
| NMB1849 | 13 | carbamoyl-phosphate synthase, small subunit ( carA )             |
| NMB1850 | 11 | hypothetical protein                                             |
| NMB1851 | 12 | hypothetical protein                                             |
| NMB1852 | 10 | conserved hypothetical protein                                   |
| NMB1853 | 13 | hypothetical protein                                             |
| NMB1854 | 12 | hypothetical protein                                             |
| NMB1855 | 10 | carbamoyl-phosphate synthase, large subunit ( carB )             |
| NMB1856 | 9  | transcriptional regulator, LysR family                           |
| NMB1857 | 12 | modulator of drug activity B ( mdaB )                            |
| NMB1858 | 2  | hypothetical protein                                             |
| NMB1859 | 12 | S-adenosylmethionine:tRNA ribosyltransferase-isomerase ( queA )  |
| NMB1860 | 13 | acetyl-CoA carboxylase, biotin carboxyl carrier protein ( accB ) |
| NMB1861 | 12 | acetyl-CoA carboxylase, biotin carboxylase ( accC )              |
| NMB1862 | 13 | ribosomal protein L11 methyltransferase ( prmA )                 |
| NMB1863 | 13 | oligoribonuclease ( orn )                                        |
| NMB1864 | 7  | glutamate-1-semialdehyde 2,1-aminomutase ( hemL )                |
| NMB1865 | 13 | hypothetical protein                                             |
| NMB1866 | 9  | conserved hypothetical protein                                   |
| NMB1867 | 12 | 1-deoxyxylulose-5-phosphate synthase ( dxs )                     |
| NMB1868 | 6  | integrase/recombinase XerC ( xerC )                              |
| NMB1869 | 4  | fructose-bisphosphate aldolase ( cbbA )                          |
| NMB1871 | 4  | conserved hypothetical protein                                   |
| NMB1872 | 13 | ribosomal-protein-alanine acetyltransferase, putative            |
| NMB1873 | 3  | DNA polymerase, bacteriophage-type, putative                     |
| NMB1874 | 1  | orotate phosphoribosyltransferase ( pyrE )                       |
| NMB1875 | 7  | hypothetical protein                                             |
| NMB1876 | 12 | N-acetylglutamate synthase ( argA )                              |
| NMB1877 | 8  | prolyl oligopeptidase family protein                             |
| NMB1878 | 13 | transcriptional regulator, AraC family                           |
| NMB1884 | 12 | conserved hypothetical protein                                   |
| NMB1885 | 13 | protein-L-isoaspartate O-methyltransferase ( pcm )               |
| NMB1886 | 9  | conserved hypothetical protein                                   |
| NMB1887 | 13 | triosephosphate isomerase ( tpiA )                               |
| NMB1888 | 8  | protein-export membrane protein SecG ( secG )                    |
| NMB1892 | 7  | hypothetical protein                                             |
| NMB1893 | 13 | conserved hypothetical protein                                   |
| NMB1894 | 13 | leucyl-tRNA synthetase, truncation                               |
| NMB1895 | 13 | DNA adenine methylase, truncation                                |
| NMB1896 | 13 | type II restriction enzyme DpnI ( dpnC )                         |
| NMB1897 | 13 | leucyl-tRNA synthetase ( leuS )                                  |
| NMB1898 | 13 | lipoprotein ( mlp )                                              |
| NMB1899 | 7  | hypothetical protein                                             |

|         |    |                                                                       |
|---------|----|-----------------------------------------------------------------------|
| NMB1900 | 12 | polyphosphate kinase ( ppk )                                          |
| NMB1901 | 13 | IS1016 transposase                                                    |
| NMB1902 | 13 | DNA polymerase III, beta subunit ( dnaN )                             |
| NMB1903 | 13 | chromosomal replication initiator protein DnaA ( dnaA )               |
| NMB1904 | 13 | ribosomal protein L34 ( rpl34 )                                       |
| NMB1905 | 7  | ribonuclease P protein component ( rnpA )                             |
| NMB1906 | 8  | conserved hypothetical protein                                        |
| NMB1907 | 9  | 60 kd inner-membrane protein ( yidC )                                 |
| NMB1908 | 10 | conserved hypothetical protein                                        |
| NMB1909 | 13 | Maf/YceF/YhdE family protein                                          |
| NMB1910 | 9  | conserved hypothetical protein                                        |
| NMB1911 | 6  | 50S ribosomal protein L32 ( rpmF )                                    |
| NMB1912 | 13 | conserved hypothetical protein                                        |
| NMB1913 | 13 | fatty acid-phospholipid synthesis protein ( plsX )                    |
| NMB1914 | 13 | hypothetical protein                                                  |
| NMB1915 | 13 | hypothetical protein                                                  |
| NMB1916 | 13 | 3-oxoacyl-(acyl-carrier-protein) synthase III ( fabH )                |
| NMB1917 | 8  | conserved hypothetical protein                                        |
| NMB1918 | 13 | malonyl CoA-acyl carrier protein transacylase ( fabD )                |
| NMB1919 | 12 | ABC transporter, ATP-binding protein                                  |
| NMB1920 | 13 | GMP synthase ( guaA )                                                 |
| NMB1921 | 13 | 3-oxoacyl-(acyl-carrier-protein) reductase ( fabG-2 )                 |
| NMB1923 | 12 | conserved hypothetical protein                                        |
| NMB1924 | 13 | inositol monophosphatase family protein                               |
| NMB1925 | 13 | conserved hypothetical protein                                        |
| NMB1927 | 13 | lacto-N-neotetraose biosynthesis glycosyl transferase-related protein |
| NMB1928 | 13 | lacto-N-neotetraose biosynthesis glycosyl transferase LgtB ( lgtB )   |
| NMB1929 | 13 | lacto-N-neotetraose biosynthesis glycosyl transferase LgtA ( lgtA )   |
| NMB1930 | 11 | glycyl-tRNA synthetase, beta chain ( glyS )                           |
| NMB1931 | 12 | hypothetical protein                                                  |
| NMB1932 | 12 | glycyl-tRNA synthetase, alpha chain ( glyQ )                          |
| NMB1933 | 13 | ATP synthase F1, epsilon subunit ( atpC )                             |
| NMB1934 | 13 | ATP synthase F1, beta subunit ( atpD )                                |
| NMB1935 | 13 | ATP synthase F1, gamma subunit ( atpG )                               |
| NMB1936 | 13 | ATP synthase F1, alpha subunit ( atpA )                               |
| NMB1938 | 6  | ATP synthase F0, B subunit ( atpF )                                   |
| NMB1939 | 13 | ATP synthase F0, C subunit ( atpE )                                   |
| NMB1940 | 13 | ATP synthase F0, A subunit ( atpB )                                   |
| NMB1941 | 13 | hypothetical protein                                                  |
| NMB1944 | 12 | ParB family protein                                                   |
| NMB1945 | 13 | 3-octaprenyl-4-hydroxybenzoate carboxy-lyase ( ubiX )                 |
| NMB1946 | 13 | outer membrane lipoprotein                                            |
| NMB1947 | 13 | ABC transporter, permease protein                                     |
| NMB1948 | 12 | ABC transporter, ATP-binding protein                                  |
| NMB1949 | 13 | soluble lytic murein transglycosylase, putative                       |
| NMB1950 | 12 | 30S ribosomal protein S21 ( rpsU )                                    |
| NMB1951 | 13 | conserved hypothetical protein                                        |
| NMB1952 | 12 | stringent starvation protein B ( sspB / regG)                         |
| NMB1953 | 13 | stringent starvation protein A ( sspA / regF)                         |
| NMB1954 | 13 | hypothetical protein                                                  |
| NMB1955 | 13 | cadmium resistance protein                                            |
| NMB1956 | 13 | 50S ribosomal protein L31 ( rpmE )                                    |
| NMB1958 | 12 | thioredoxin, putative                                                 |
| NMB1959 | 13 | conserved hypothetical protein                                        |
| NMB1960 | 13 | hypothetical protein                                                  |
| NMB1961 | 12 | VacJ-related protein                                                  |
| NMB1962 | 10 | hypothetical protein                                                  |
| NMB1963 | 13 | conserved hypothetical protein                                        |
| NMB1964 | 12 | conserved hypothetical protein                                        |

|         |    |                                                                                                |
|---------|----|------------------------------------------------------------------------------------------------|
| NMB1965 | 9  | conserved hypothetical protein                                                                 |
| NMB1966 | 11 | ABC transporter, ATP-binding protein                                                           |
| NMB1967 | 13 | transcriptional regulator, AraC family                                                         |
| NMB1968 | 12 | aldehyde dehydrogenase A ( aldA )                                                              |
| NMB1970 | 13 | para-aminobenzoate synthetase component I-4-amino-4-deoxychorismate lyase, putative ( pabB-C ) |
| NMB1971 | 10 | conserved hypothetical protein                                                                 |
| NMB1972 | 13 | chaperonin, 60 kDa ( groEL )                                                                   |
| NMB1973 | 2  | chaperonin, 10 kDa ( groES )                                                                   |
| NMB1974 | 13 | IS1016 transposase                                                                             |
| NMB1975 | 12 | sodium- and chloride-dependent transporter                                                     |
| NMB1976 | 10 | diaminopimelate decarboxylase ( lysA )                                                         |
| NMB1977 | 9  | hypothetical protein                                                                           |
| NMB1978 | 9  | cyaY protein ( cyaY )                                                                          |
| NMB1979 | 11 | conserved hypothetical protein                                                                 |
| NMB1980 | 10 | conserved hypothetical protein                                                                 |
| NMB1981 | 9  | conserved hypothetical protein                                                                 |
| NMB1982 | 9  | DNA polymerase I ( polA )                                                                      |
| NMB1983 | 13 | hypothetical protein                                                                           |
| NMB1984 | 13 | IS1106 transposase                                                                             |
| NMB1985 | 9  | adhesion and penetration protein ( hap )                                                       |
| NMB1986 | 13 | hypothetical protein                                                                           |
| NMB1987 | 9  | thiophene and furan oxidation protein ThdF ( thdF )                                            |
| NMB1988 | 3  | iron-regulated outer membrane protein FrpB ( frpB )                                            |
| NMB1989 | 13 | iron(III) ABC transporter, periplasmic binding protein                                         |
| NMB1990 | 13 | iron(III) ABC transporter, permease protein                                                    |
| NMB1991 | 13 | iron(III) ABC transporter, permease protein                                                    |
| NMB1992 | 3  | hypothetical protein                                                                           |
| NMB1993 | 13 | iron(III) ABC transporter, ATP-binding protein                                                 |
| NMB1995 | 4  | nitrogen regulatory protein P-II ( glnB )                                                      |
| NMB1996 | 3  | phosphoribosylformylglycinamide synthase ( purL )                                              |
| NMB1997 | 4  | hydroxyacylglutathione hydrolase ( hagH )                                                      |
| NMB1999 | 13 | magnesium transporter ( mgfE )                                                                 |
| NMB2001 | 3  | conserved hypothetical protein                                                                 |
| NMB2002 | 5  | hypothetical protein                                                                           |
| NMB2003 | 12 | conserved hypothetical protein                                                                 |
| NMB2004 | 10 | conserved hypothetical protein                                                                 |
| NMB2005 | 6  | glutamate N-acetyltransferase/amino-acid acetyltransferase ( argJ )                            |
| NMB2006 | 6  | chloride channel protein-related protein                                                       |
| NMB2007 | 7  | ATP-dependent RNA helicase HrpA, truncation                                                    |
| NMB2009 | 13 | ATP-dependent RNA helicase HrpA, degenerate                                                    |
| NMB2010 | 4  | YhbX/YhjW/YijP/YjdB family protein                                                             |
| NMB2011 | 6  | ATP-dependent RNA helicase HrpA,                                                               |
| NMB2015 | 13 | hypothetical protein                                                                           |
| NMB2016 | 11 | type IV pilin-related protein ComP ( comP )                                                    |
| NMB2017 | 13 | putative DNA transport competence protein                                                      |
| NMB2019 | 13 | lipopolysaccharide core biosynthesis protein KdtB ( kdtB )                                     |
| NMB2020 | 12 | conserved hypothetical protein                                                                 |
| NMB2021 | 7  | conserved hypothetical protein                                                                 |
| NMB2022 | 6  | conserved hypothetical protein                                                                 |
| NMB2023 | 13 | conserved hypothetical protein                                                                 |
| NMB2024 | 12 | conserved hypothetical protein                                                                 |
| NMB2025 | 6  | conserved hypothetical protein                                                                 |
| NMB2026 | 4  | ABC transporter, permease protein                                                              |
| NMB2029 | 7  | homoserine kinase ( thrB )                                                                     |
| NMB2030 | 10 | 3-demethylubiquinone-9 3-methyltransferase ( ubiG )                                            |
| NMB2031 | 13 | tryptophan transporter ( mtr )                                                                 |
| NMB2032 | 12 | lipopolysaccharide glycosyl transferase, ( lgtG )                                              |
| NMB2033 | 1  | histidinol-phosphatase, putative                                                               |
| NMB2034 | 12 | 1-acyl-sn-glycerol-3-phosphate acyltransferase, putative                                       |

|         |    |                                                                                          |
|---------|----|------------------------------------------------------------------------------------------|
| NMB2035 | 6  | conserved hypothetical protein                                                           |
| NMB2036 | 13 | tRNA pseudouridine synthase A ( truA )                                                   |
| NMB2039 | 12 | major outer membrane protein PIB ( porB )                                                |
| NMB2040 | 13 | thiamine biosynthesis protein ThiC ( thiC )                                              |
| NMB2041 | 13 | thiamin pyrophosphokinase-related protein                                                |
| NMB2042 | 13 | spermidine-putrescine ABC transporter, ATP-binding protein ( potA-2 )                    |
| NMB2043 | 13 | IS1106 transposase                                                                       |
| NMB2044 | 13 | phosphoenolpyruvate-protein phosphotransferase ( ptsI )                                  |
| NMB2045 | 13 | phosphocarrier protein HPr ( ptsH )                                                      |
| NMB2046 | 13 | PTS system, IIB component                                                                |
| NMB2047 | 13 | hypoxanthine-guanine phosphoribosyltransferase, putative                                 |
| NMB2048 | 13 | DNA ligase ( ligA-2 )                                                                    |
| NMB2049 | 11 | glyoxalase II family protein                                                             |
| NMB2050 | 10 | conserved hypothetical protein                                                           |
| NMB2051 | 13 | ubiquinol--cytochrome c reductase, cytochrome c1 ( petC )                                |
| NMB2052 | 13 | ubiquinol--cytochrome c reductase, cytochrome b ( petB )                                 |
| NMB2053 | 11 | ubiquinol--cytochrome c reductase, iron-sulfur subunit ( petA )                          |
| NMB2054 | 13 | conserved hypothetical protein                                                           |
| NMB2055 | 10 | transcriptional regulator, LysR family                                                   |
| NMB2056 | 5  | 30S ribosomal protein S9 ( rpsI )                                                        |
| NMB2057 | 12 | 50S ribosomal protein L13 ( rplM )                                                       |
| NMB2058 | 11 | conserved hypothetical protein                                                           |
| NMB2059 | 8  | hypothetical protein                                                                     |
| NMB2060 | 13 | glycerol-3-phosphate dehydrogenase (NAD\+)( gpsA )                                       |
| NMB2061 | 3  | phosphoenolpyruvate carboxylase ( ppc )                                                  |
| NMB2062 | 7  | thiF protein ( thiF )                                                                    |
| NMB2063 | 13 | slyX protein, putative                                                                   |
| NMB2064 | 7  | conserved hypothetical protein                                                           |
| NMB2065 | 7  | hemK protein ( hemK )                                                                    |
| NMB2066 | 12 | tldD protein ( tldD )                                                                    |
| NMB2067 | 6  | conserved hypothetical protein                                                           |
| NMB2068 | 9  | D-amino acid oxidase flavoprotein, putative                                              |
| NMB2069 | 7  | thiamin-phosphate pyrophosphorylase ( thiE )                                             |
| NMB2070 | 9  | hypothetical protein                                                                     |
| NMB2071 | 9  | thiG protein ( thiG )                                                                    |
| NMB2072 | 7  | hypothetical protein                                                                     |
| NMB2073 | 9  | hypothetical protein                                                                     |
| NMB2074 | 13 | hypothetical protein                                                                     |
| NMB2075 | 7  | BirA protein/Bvg accessory factor                                                        |
| NMB2076 | 10 | aut protein ( aut )                                                                      |
| NMB2077 | 7  | methylenetetrahydrofolate dehydrogenase-methenyltetrahydrofolate cyclohydrolase ( fold ) |
| NMB2078 | 9  | conserved hypothetical protein                                                           |
| NMB2079 | 7  | aspartate-semialdehyde dehydrogenase ( asd )                                             |
| NMB2080 | 3  | hypothetical protein                                                                     |
| NMB2081 | 6  | hypothetical protein                                                                     |
| NMB2082 | 8  | exodeoxyribonuclease ( exoA )                                                            |
| NMB2083 | 7  | cysteinyl-tRNA synthetase ( cysS )                                                       |
| NMB2085 | 13 | hypothetical protein                                                                     |
| NMB2086 | 13 | GTP-binding protein                                                                      |
| NMB2088 | 12 | conserved hypothetical protein                                                           |
| NMB2089 | 13 | hypothetical protein                                                                     |
| NMB2090 | 13 | phosphoheptose isomerase ( gmhA )                                                        |
| NMB2091 | 13 | hemolysin, putative                                                                      |
| NMB2092 | 13 | hypothetical protein                                                                     |
| NMB2093 | 10 | methionine aminopeptidase ( map )                                                        |
| NMB2094 | 8  | hypothetical protein                                                                     |
| NMB2095 | 13 | adhesin complex protein, putative                                                        |
| NMB2096 | 10 | malate:quinone oxidoreductase ( yojH )                                                   |
| NMB2097 | 7  | hypothetical protein                                                                     |

|         |    |                                                        |
|---------|----|--------------------------------------------------------|
| NMB2098 | 13 | conserved hypothetical protein                         |
| NMB2099 | 10 | conserved hypothetical protein                         |
| NMB2100 | 13 | hypothetical protein                                   |
| NMB2101 | 11 | 30S ribosomal protein S2 ( rpsB )                      |
| NMB2102 | 12 | elongation factor TS (EF-TS) ( tsf )                   |
| NMB2103 | 12 | uridylate kinase ( pyrH )                              |
| NMB2104 | 11 | MafA protein sequence                                  |
| NMB2105 | 10 | mafB protein (mafB)                                    |
| NMB2106 | 13 | hypothetical protein                                   |
| NMB2107 | 13 | alternative C-terminus for mafB                        |
| NMB2109 | 13 | hypothetical protein                                   |
| NMB2110 | 13 | hypothetical protein                                   |
| NMB2111 | 13 | alternative C-terminus for mafB                        |
| NMB2112 | 13 | hypothetical protein                                   |
| NMB2113 | 13 | hypothetical protein                                   |
| NMB2114 | 13 | alternative C-terminus for mafB                        |
| NMB2115 | 12 | hypothetical protein                                   |
| NMB2116 | 13 | hypothetical protein                                   |
| NMB2117 | 13 | alternative C-terminus for mafB                        |
| NMB2118 | 13 | hypothetical protein                                   |
| NMB2119 | 13 | alternative C-terminus for mafB                        |
| NMB2120 | 13 | hypothetical protein                                   |
| NMB2121 | 13 | hypothetical protein                                   |
| NMB2123 | 13 | hypothetical protein                                   |
| NMB2125 | 13 | hypothetical protein                                   |
| NMB2126 | 13 | IS1016 family transposase                              |
| NMB2127 | 8  | protease, putative                                     |
| NMB2128 | 12 | CinA-related protein                                   |
| NMB2129 | 12 | argininosuccinate synthase ( argG )                    |
| NMB2130 | 12 | hypothetical protein                                   |
| NMB2132 | 12 | transferrin-binding protein-related protein            |
| NMB2133 | 13 | sodium/dicarboxylate symporter family protein          |
| NMB2134 | 12 | conserved hypothetical protein                         |
| NMB2135 | 13 | conserved hypothetical protein                         |
| NMB2136 | 12 | peptide transporter                                    |
| NMB2137 | 12 | hypothetical protein                                   |
| NMB2138 | 11 | peptide chain release factor 2 ( prfB )                |
| NMB2139 | 12 | conserved hypothetical protein                         |
| NMB2140 | 13 | conserved hypothetical protein                         |
| NMB2141 | 9  | hypothetical protein                                   |
| NMB2142 | 13 | conserved hypothetical protein                         |
| NMB2143 | 13 | conserved hypothetical protein                         |
| NMB2144 | 5  | sigma factor, putative                                 |
| NMB2145 | 13 | hypothetical protein                                   |
| NMB2146 | 7  | hypothetical protein                                   |
| NMB2147 | 13 | hypothetical protein                                   |
| NMB2150 | 13 | conserved hypothetical protein                         |
| NMB2151 | 13 | phosphoribosylamine--glycine ligase ( purD )           |
| NMB2152 | 11 | hypothetical protein                                   |
| NMB2153 | 13 | conserved hypothetical protein                         |
| NMB2154 | 9  | electron transfer flavoprotein, alpha subunit ( etfA ) |
| NMB2155 | 13 | electron transfer flavoprotein, beta subunit ( etfB )  |
| NMB2156 | 13 | heptosyltransferase I ( rfaC )                         |
| NMB2157 | 11 | pyrazinamidase/nicotinamidase PncA, putative           |
| NMB2158 | 6  | conserved hypothetical protein                         |
| NMB2159 | 4  | glyceraldehyde 3-phosphate dehydrogenase ( gapA-2 )    |
| NMB2160 | 5  | DNA mismatch repair protein MutS ( mutS )              |
| NMA0001 | 5  | hypothetical protein                                   |
| NMA0024 | 13 | hypothetical protein                                   |

|          |    |                                                       |
|----------|----|-------------------------------------------------------|
| NMA0036  | 10 | hypothetical protein                                  |
| NMA0038  | 13 | hypothetical protein                                  |
| NMA0039  | 13 | hypothetical protein                                  |
| NMA0040  | 12 | hypothetical protein                                  |
| NMA0041  | 6  | hypothetical protein                                  |
| NMA0046  | 7  | putative transmembrane transport protein              |
| NMA0047  | 4  | hypothetical protein                                  |
| NMA0051  | 9  | hypothetical protein                                  |
| NMA0053  | 11 | hypothetical protein                                  |
| NMA0068  | 13 | hypothetical protein                                  |
| NMA0089  | 13 | hypothetical protein                                  |
| NMA0131  | 13 | hypothetical protein                                  |
| NMA0132A | 13 | hypothetical protein                                  |
| NMA0140  | 4  | hypothetical protein                                  |
| NMA0170  | 12 | putative lipoprotein                                  |
| NMA0171A | 8  | hypothetical protein                                  |
| NMA0179  | 12 | hypothetical protein                                  |
| NMA0212  | 9  | hypothetical protein                                  |
| NMA0223  | 10 | hypothetical protein                                  |
| NMA0236  | 13 | hypothetical protein                                  |
| NMA0318  | 13 | hypothetical protein                                  |
| NMA0322  | 13 | hypothetical protein                                  |
| NMA0324  | 13 | mafB protein ( mafB )                                 |
| NMA0330  | 13 | conserved hypothetical protein                        |
| NMA0360  | 12 | hypothetical protein                                  |
| NMA0366  | 13 | hypothetical protein                                  |
| NMA0372  | 13 | very hypothetical protein                             |
| NMA0395  | 13 | hypothetical protein                                  |
| NMA0396  | 7  | hypothetical protein                                  |
| NMA0398  | 12 | major outer membrane protein PIB ( porB )             |
| NMA0426A | 7  | hypothetical protein                                  |
| NMA0432  | 6  | hypothetical protein                                  |
| NMA0455  | 12 | hypothetical protein                                  |
| NMA0474  | 9  | hemoglobin-haptoglobin utilization protein ( hpuB )   |
| NMA0475  | 8  | hemoglobin-haptoglobin utilization protein ( hpuA )   |
| NMA0481  | 12 | hypothetical protein                                  |
| NMA0482  | 13 | hypothetical protein                                  |
| NMA0500  | 13 | hypothetical protein                                  |
| NMA0527  | 13 | lacto-N-neotetraose biosynthesis glycosyl transferase |
| NMA0598  | 11 | hypothetical protein                                  |
| NMA0606  | 13 | hypothetical protein                                  |
| NMA0629  | 12 | hypothetical protein                                  |
| NMA0630  | 10 | hypothetical protein                                  |
| NMA0631  | 13 | hypothetical protein                                  |
| NMA0640  | 13 | hypothetical protein                                  |
| NMA0641  | 7  | conserved hypothetical protein                        |
| NMA0677  | 6  | hypothetical protein                                  |
| NMA0686  | 8  | putative ABC transporter protein                      |
| NMA0701  | 1  | hypothetical protein                                  |
| NMA0772  | 6  | putative DNA-invertase                                |
| NMA0773  | 6  | hypothetical protein                                  |
| NMA0774  | 6  | hypothetical protein                                  |
| NMA0775  | 6  | possible integral membrane protein                    |
| NMA0778  | 6  | hypothetical protein                                  |
| NMA0779  | 4  | putative integral membrane protein                    |
| NMA0780  | 6  | hypothetical protein                                  |
| NMA0781  | 6  | hypothetical protein                                  |
| NMA0782  | 3  | putative phage replication protein                    |
| NMA0783  | 6  | putative phage replication protein                    |

|         |    |                                                    |
|---------|----|----------------------------------------------------|
| NMA0787 | 3  | hypothetical protein                               |
| NMA0799 | 8  | hypothetical protein                               |
| NMA0814 | 13 | hypothetical protein                               |
| NMA0817 | 13 | putative polyamine permease inner membrane protein |
| NMA0845 | 13 | hypothetical protein                               |
| NMA0854 | 12 | hypothetical protein                               |
| NMA0855 | 12 | hypothetical protein                               |
| NMA0856 | 12 | hypothetical protein                               |
| NMA0857 | 13 | hypothetical protein                               |
| NMA0858 | 5  | hypothetical protein                               |
| NMA0860 | 3  | bis(5 prime nucleosyl)-tetrphosphatase (apaH)      |
| NMA0871 | 12 | hypothetical protein                               |
| NMA0877 | 13 | hypothetical protein                               |
| NMA0883 | 8  | putative lipoprotein                               |
| NMA0936 | 1  | hypothetical protein                               |
| NMA0939 | 13 | hypothetical protein                               |
| NMA0951 | 13 | conserved hypothetical                             |
| NMA0971 | 4  | putative lipoprotein                               |
| NMA0973 | 10 | putative integral membrane protein                 |
| NMA1014 | 1  | hypothetical protein                               |
| NMA1075 | 8  | hypothetical protein                               |
| NMA1081 | 4  | putative membrane protein                          |
| NMA1082 | 13 | hypothetical protein                               |
| NMA1083 | 2  | putative periplasmic protein                       |
| NMA1131 | 13 | hypothetical protein                               |
| NMA1157 | 6  | hypothetical protein                               |
| NMA1158 | 12 | hypothetical protein                               |
| NMA1165 | 7  | hypothetical protein                               |
| NMA1173 | 2  | putative cell-surface protein                      |
| NMA1174 | 2  | hypothetical protein                               |
| NMA1190 | 13 | hypothetical protein                               |
| NMA1194 | 7  | hypothetical protein                               |
| NMA1195 | 13 | hypothetical protein                               |
| NMA1208 | 7  | hypothetical protein                               |
| NMA1211 | 13 | hypothetical protein                               |
| NMA1229 | 13 | putative membrane protein                          |
| NMA1231 | 13 | hypothetical protein                               |
| NMA1258 | 13 | conserved hypothetical protein                     |
| NMA1282 | 13 | putative DNA-binding protein                       |
| NMA1283 | 13 | hypothetical protein                               |
| NMA1293 | 13 | putative phage anti-repressor protein              |
| NMA1294 | 13 | hypothetical protein                               |
| NMA1305 | 13 | hypothetical protein                               |
| NMA1308 | 10 | hypothetical protein                               |
| NMA1311 | 2  | hypothetical protein                               |
| NMA1312 | 8  | putative DNA-binding protein                       |
| NMA1313 | 4  | hypothetical protein                               |
| NMA1326 | 4  | hypothetical protein                               |
| NMA1426 | 12 | hypothetical protein                               |
| NMA1435 | 13 | hypothetical protein                               |
| NMA1436 | 11 | hypothetical protein                               |
| NMA1442 | 6  | ferredoxin--NADP reductase ( fpr-1 )               |
| NMA1484 | 12 | hypothetical protein                               |
| NMA1489 | 11 | hypothetical protein                               |
| NMA1587 | 13 | hypothetical protein                               |
| NMA1595 | 9  | hypothetical protein                               |
| NMA1602 | 10 | hypothetical protein                               |
| NMA1615 | 10 | hypothetical protein                               |
| NMA1637 | 13 | hypothetical protein                               |



|         |    |                                              |
|---------|----|----------------------------------------------|
| NMA1654 | 13 | hypothetical protein                         |
| NMA1690 | 13 | hypothetical protein                         |
| NMA1692 | 13 | putative membrane peptidase                  |
| NMA1697 | 7  | hypothetical protein                         |
| NMA1723 | 13 | Lip / H8 outer membrane protein              |
| NMA1733 | 3  | H.8 outer membrane protein                   |
| NMA1752 | 10 | hypothetical protein                         |
| NMA1780 | 13 | hypothetical protein                         |
| NMA1789 | 2  | hypothetical protein                         |
| NMA1791 | 9  | hypothetical protein                         |
| NMA1807 | 9  | hypothetical protein                         |
| NMA1827 | 1  | hypothetical protein                         |
| NMA1828 | 3  | hypothetical protein                         |
| NMA1829 | 5  | hypothetical protein                         |
| NMA1830 | 4  | hypothetical protein                         |
| NMA1831 | 3  | hypothetical protein                         |
| NMA1832 | 1  | hypothetical protein                         |
| NMA1833 | 4  | hypothetical DNA-binding protein             |
| NMA1838 | 6  | hypothetical DNA-binding protein             |
| NMA1840 | 3  | hypothetical protein                         |
| NMA1841 | 3  | hypothetical protein                         |
| NMA1842 | 2  | hypothetical protein                         |
| NMA1843 | 6  | hypothetical protein                         |
| NMA1847 | 2  | conserved hypothetical protein               |
| NMA1848 | 4  | hypothetical protein                         |
| NMA1849 | 5  | hypothetical protein                         |
| NMA1850 | 3  | hypothetical protein                         |
| NMA1851 | 4  | conserved hypothetical protein               |
| NMA1852 | 2  | hypothetical protein                         |
| NMA1858 | 7  | hypothetical protein                         |
| NMA1862 | 13 | hypothetical protein                         |
| NMA1866 | 4  | putative integral membrane protein           |
| NMA1871 | 6  | hypothetical protein                         |
| NMA1872 | 11 | hypothetical protein                         |
| NMA1873 | 13 | hypothetical protein                         |
| NMA1874 | 10 | hypothetical protein                         |
| NMA1881 | 5  | hypothetical DNA-binding protein             |
| NMA1884 | 4  | putative regulator                           |
| NMA1904 | 13 | hypothetical protein                         |
| NMA1924 | 9  | hypothetical protein                         |
| NMA1954 | 12 | hypothetical protein                         |
| NMA1978 | 13 | hypothetical protein                         |
| NMA2029 | 2  | hypothetical protein                         |
| NMA2087 | 12 | putative transcriptional regulator           |
| NMA2116 | 13 | hypothetical protein                         |
| NMA2120 | 13 | hypothetical protein                         |
| NMA2121 | 12 | hypothetical protein                         |
| NMA2137 | 13 | hypothetical protein                         |
| NMA2149 | 9  | putative inner membrane hypothetical protein |
| NMA2172 | 4  | conserved hypothetical protein               |
| NMA2222 | 10 | hypothetical protein                         |
| NMA2230 | 5  | hypothetical protein                         |
| XNG0034 | 13 | hypothetical protein                         |
| XNG0062 | 11 | Opa protein                                  |
| XNG0065 | 11 | Opa protein                                  |
| XNG0080 | 13 | hypothetical protein                         |
| XNG0081 | 13 | conserved hypothetical protein               |
| XNG0116 | 4  | hypothetical protein                         |
| XNG0117 | 3  | hypothetical protein                         |

|          |    |                                                                                  |
|----------|----|----------------------------------------------------------------------------------|
| XNG0118  | 5  | dead colicin secretion type ATP transporter                                      |
| XNG0143  | 3  | conserved hypothetical protein                                                   |
| XNG0150  | 8  | hypothetical protein                                                             |
| XNG0178  | 9  | spermidine/putrescine ABC transporter, permease protein ( potC )                 |
| XNG0189  | 13 | glycosyltransferase                                                              |
| XNG0194  | 10 | phosphoribosylformimino-5-aminoimidazole carboxamide ribotide isomerase ( hisA ) |
| XNG0200  | 13 | hypothetical protein                                                             |
| XNG0210  | 12 | hypothetical protein                                                             |
| XNG0211  | 11 | hypothetical protein                                                             |
| XNG0212  | 12 | hypothetical protein                                                             |
| XNG0213  | 11 | hypothetical protein                                                             |
| XNG0214  | 12 | hypothetical protein                                                             |
| XNG0217  | 2  | ribonuclease, putative                                                           |
| XNG0234  | 7  | acetyl-CoA carboxylase, carboxyl transferase beta subunit ( accD )               |
| XNG0255  | 9  | hypothetical protein                                                             |
| XNG0256  | 7  | hypothetical protein                                                             |
| XNG0270  | 12 | conserved hypothetical protein                                                   |
| XNG0272  | 9  | RNA polymerase sigma-32 factor ( rpoH )                                          |
| XNG0284  | 13 | very short patch repair endonuclease                                             |
| XNG0285  | 12 | restriction system methylase                                                     |
| XNG0304  | 13 | hypothetical protein                                                             |
| XNG0311  | 7  | conserved hypothetical protein                                                   |
| XNG0322  | 11 | hypothetical protein                                                             |
| XNG0360  | 13 | hypothetical protein                                                             |
| XNG0369  | 13 | conserved hypothetical protein                                                   |
| XNG0375  | 13 | transcriptional regulator, TetR family                                           |
| XNG0387  | 4  | DNA damage inducible protein D                                                   |
| XNG0388  | 11 | hypothetical protein                                                             |
| XNG0388  | 7  | hypothetical protein                                                             |
| XNG0418  | 7  | pantoate--beta-alanine ligase ( panC )                                           |
| XNG0419  | 11 | conserved hypothetical protein                                                   |
| XNG0433  | 13 | fimT homologue                                                                   |
| XNG0438  | 11 | hypothetical protein                                                             |
| XNG0446  | 2  | hypothetical protein                                                             |
| XNG0453  | 5  | hypothetical protein                                                             |
| XNG0454  | 4  | hypothetical protein                                                             |
| XNG0457  | 1  | hypothetical protein                                                             |
| XNG0468  | 5  | hypothetical protein                                                             |
| XNG0470  | 5  | bacteriophage endoxyribonuclease                                                 |
| XNG0471  | 2  | hypothetical protein                                                             |
| XNG0472  | 2  | hypothetical protein                                                             |
| XNG0473  | 1  | hypothetical protein                                                             |
| XNG0475  | 8  | hypothetical protein                                                             |
| XNG0494  | 8  | hypothetical protein                                                             |
| XNG0497  | 5  | hypothetical protein                                                             |
| XNG0498  | 2  | hypothetical protein                                                             |
| XNG0501  | 2  | hypothetical protein                                                             |
| XNG0503a | 11 | hypothetical protein                                                             |
| XNG0511  | 13 | sugar efflux transporter                                                         |
| XNG0550  | 13 | hypothetical protein                                                             |
| XNG0562  | 13 | hypothetical protein                                                             |
| XNG0571  | 12 | conserved hypothetical protein                                                   |
| XNG0606  | 5  | cell filamentation protein                                                       |
| XNG0607  | 5  | hypothetical protein                                                             |
| XNG0610  | 13 | L-lactate dehydrogenase ( lldD )                                                 |
| XNG0612  | 13 | Restriction system methylase                                                     |
| XNG0636  | 11 | hypothetical protein                                                             |
| XNG0662  | 13 | hypothetical protein                                                             |
| XNG0664  | 9  | conserved hypothetical protein                                                   |

|         |    |                                                                |
|---------|----|----------------------------------------------------------------|
| XNG0665 | 8  | Type I restriction enzyme R protein                            |
| XNG0666 | 13 | hypothetical protein                                           |
| XNG0667 | 12 | Type I restriction modification system specificity (S) protein |
| XNG0668 | 1  | hypothetical protein                                           |
| XNG0670 | 13 | Type I restriction enzyme M protein                            |
| XNG0672 | 11 | hemagglutinin/hemolysin related protein                        |
| XNG0674 | 12 | hypothetical protein                                           |
| XNG0688 | 3  | hypothetical protein                                           |
| XNG0690 | 3  | baseplate assembly protein V from bacteriophage P2             |
| XNG0697 | 5  | hypothetical protein                                           |
| XNG0703 | 11 | DNA polymerase III, subunits gamma and tau ( dnaX )            |
| XNG0705 | 13 | hypothetical protein                                           |
| XNG0711 | 13 | hypothetical protein                                           |
| XNG0714 | 6  | molybdopterin-guanine dinucleotide biosynthesis protein A      |
| XNG0716 | 13 | conserved hypothetical protein                                 |
| XNG0726 | 13 | hypothetical protein                                           |
| XNG0731 | 3  | pilin gene inverting protein PivNM-1B ( pivNM-1B )             |
| XNG0732 | 11 | conserved hypothetical protein                                 |
| XNG0763 | 13 | hypothetical protein                                           |
| XNG0810 | 4  | surface protein with limited homology with opc                 |
| XNG0828 | 7  | hypothetical protein                                           |
| XNG0841 | 9  | plasmid stability protein stbB                                 |
| XNG0842 | 11 | plasmid stability protein                                      |
| XNG0861 | 13 | 50S ribosomal protein L31, putative ( rpmE )                   |
| XNG0871 | 12 | conserved hypothetical protein                                 |
| XNG0877 | 11 | Opa protein                                                    |
| XNG0910 | 13 | transcriptional regulator                                      |
| XNG0920 | 6  | hypothetical protein                                           |
| XNG0921 | 13 | hypothetical protein                                           |
| XNG0923 | 6  | hypothetical protein                                           |
| XNG0924 | 12 | hypothetical protein                                           |
| XNG0925 | 4  | hypothetical protein                                           |
| XNG0927 | 4  | conserved hypothetical                                         |
| XNG0928 | 7  | hypothetical protein                                           |
| XNG0930 | 11 | hypothetical protein                                           |
| XNG0931 | 11 | hypothetical protein                                           |
| XNG0932 | 11 | hypothetical protein                                           |
| XNG0933 | 11 | hypothetical protein                                           |
| XNG0938 | 8  | hypothetical protein                                           |
| XNG0952 | 11 | Opa protein                                                    |
| XNG0954 | 12 | exopolyphosphatase ( ppx )                                     |
| XNG0983 | 13 | alternative C-terminus for mafB                                |
| XNG0987 | 11 | Opa protein                                                    |
| XNG0993 | 12 | hypothetical protein                                           |
| XNG0994 | 6  | hypothetical protein                                           |
| XNG0995 | 5  | hypothetical protein                                           |
| XNG0996 | 7  | conserved hypothetical protein                                 |
| XNG1003 | 6  | hypothetical protein                                           |
| XNG1004 | 1  | hypothetical protein                                           |
| XNG1005 | 3  | hypothetical protein                                           |
| XNG1006 | 3  | hypothetical protein                                           |
| XNG1011 | 3  | hypothetical protein                                           |
| XNG1012 | 3  | hypothetical protein                                           |
| XNG1013 | 5  | hypothetical protein                                           |
| XNG1014 | 5  | bacteriophage endoxyribonuclease                               |
| XNG1024 | 6  | hypothetical protein                                           |
| XNG1025 | 1  | hypothetical protein                                           |
| XNG1027 | 4  | hypothetical protein                                           |
| XNG1028 | 5  | hypothetical protein                                           |

|          |    |                                                                   |
|----------|----|-------------------------------------------------------------------|
| XNG1038  | 11 | hypothetical protein                                              |
| XNG1041  | 13 | putative glycosyl transferase                                     |
| XNG1042  | 3  | pilin gene inverting protein PivNM-1B ( pivNM-1B )                |
| XNG1043  | 4  | hypothetical protein                                              |
| XNG1053  | 6  | hypothetical protein                                              |
| XNG1061  | 7  | hypothetical protein                                              |
| XNG1062  | 13 | hypothetical protein                                              |
| XNG1064  | 13 | hypothetical protein                                              |
| XNG1068  | 3  | pilin gene inverting protein PivNM-1B ( pivNM-1B )                |
| XNG1080  | 5  | hypothetical protein                                              |
| XNG1082  | 7  | comEA-related protein                                             |
| XNG1084a | 5  | 16S ribosomal RNA sequence                                        |
| XNG1105  | 3  | pilin gene inverting protein PivNM-1B ( pivNM-1B )                |
| XNG1110  | 13 | hypothetical protein                                              |
| XNG1114  | 13 | hypothetical protein                                              |
| XNG1115  | 8  | cytosine specific restriction modification system methylase       |
| XNG1116  | 13 | conserved hypothetical protein                                    |
| XNG1163  | 10 | sensor histidine kinase                                           |
| XNG1165  | 3  | pilin gene inverting protein PivNM-1B ( pivNM-1B )                |
| XNG1181  | 11 | Opa protein                                                       |
| XNG1184  | 13 | hypothetical protein                                              |
| XNG1200  | 13 | conserved hypothetical protein                                    |
| XNG1205  | 5  | hypothetical protein                                              |
| XNG1207  | 7  | comEA-related protein                                             |
| XNG1207a | 5  | 16S ribosomal RNA sequence                                        |
| XNG1209  | 13 | guanosine-3',5'-bis(diphosphate) 3'-pyrophosphohydrolase ( spoT ) |
| XNG1229  | 10 | tRNA (uracil-5-)-methyltransferase ( trmA )                       |
| XNG1254  | 10 | thiamine biosynthesis lipoprotein ApbE ( apbE )                   |
| XNG1284  | 6  | hypothetical protein                                              |
| XNG1286  | 8  | hypothetical protein                                              |
| XNG1287  | 8  | hypothetical protein                                              |
| XNG1288  | 13 | hypothetical protein                                              |
| XNG1289  | 12 | hypothetical protein                                              |
| XNG1290  | 7  | hypothetical protein                                              |
| XNG1297  | 13 | membrane protein ( nosY )                                         |
| XNG1300  | 13 | nitrous oxide reductase ( nosZ )                                  |
| XNG1327  | 13 | hypothetical protein                                              |
| XNG1328  | 11 | hypothetical protein                                              |
| XNG1329  | 13 | hypothetical protein                                              |
| XNG1330  | 12 | hypothetical protein                                              |
| XNG1331  | 13 | ABC transporter                                                   |
| XNG1332  | 8  | cadmium resistance protein                                        |
| XNG1335  | 13 | thiol:disulfide interchange protein DsbC ( dsbC )                 |
| XNG1341  | 13 | surface protein, adhesin                                          |
| XNG1352  | 11 | Opa protein                                                       |
| XNG1380  | 11 | transferrin-binding protein 2 ( tbp2 )                            |
| XNG1391  | 3  | DNA repair protein RecO ( recO )                                  |
| XNG1396  | 11 | Opa protein                                                       |
| XNG1400  | 12 | hypothetical protein                                              |
| XNG1437  | 11 | Opa protein                                                       |
| XNG1441  | 9  | hypothetical protein                                              |
| XNG1460  | 13 | conserved hypothetical protein                                    |
| XNG1465  | 13 | hypothetical protein                                              |
| XNG1471  | 8  | hypothetical protein                                              |
| XNG1491  | 3  | hypothetical protein                                              |
| XNG1498  | 5  | hypothetical protein                                              |
| XNG1499  | 4  | hypothetical protein                                              |
| XNG1500  | 1  | hypothetical protein                                              |
| XNG1504  | 5  | hypothetical protein                                              |

|         |    |                                                                     |
|---------|----|---------------------------------------------------------------------|
| XNG1505 | 13 | hypothetical protein                                                |
| XNG1509 | 7  | hypothetical protein                                                |
| XNG1510 | 5  | hypothetical protein                                                |
| XNG1511 | 13 | hypothetical protein                                                |
| XNG1513 | 5  | bacteriophage endodoxyribonuclease                                  |
| XNG1514 | 2  | hypothetical protein                                                |
| XNG1515 | 3  | pilin gene inverting protein PivNM-1B ( pivNM-1B )                  |
| XNG1523 | 2  | hypothetical protein                                                |
| XNG1524 | 2  | hypothetical protein                                                |
| XNG1532 | 9  | conserved hypothetical protein                                      |
| XNG1569 | 4  | hypothetical protein                                                |
| XNG1573 | 7  | comEA-related protein                                               |
| XNG1576 | 5  | 16S ribosomal RNA sequence                                          |
| XNG1582 | 9  | hypothetical protein                                                |
| XNG1583 | 3  | pilin gene inverting protein PivNM-1B ( pivNM-1B )                  |
| XNG1585 | 10 | conserved hypothetical protein                                      |
| XNG1644 | 8  | glycosyltransferase ( pglA )                                        |
| XNG1648 | 13 | cytochrome C551 peroxidase precursor (EC 1.11.1.5)                  |
| XNG1661 | 12 | hypothetical protein                                                |
| XNG1675 | 4  | Type II restriction enzyme (similar to NgoPII)                      |
| XNG1691 | 12 | hypothetical protein                                                |
| XNG1723 | 13 | 50S ribosomal protein L23 ( rplW )                                  |
| XNG1731 | 6  | hypothetical protein                                                |
| XNG1733 | 11 | hypothetical protein                                                |
| XNG1733 | 10 | hypothetical protein                                                |
| XNG1739 | 12 | 50S ribosomal protein L1 ( rplA )                                   |
| XNG1745 | 13 | conserved hypothetical protein                                      |
| XNG1746 | 11 | Opa protein                                                         |
| XNG1779 | 12 | glucose-1-phosphate thymidyltransferase ( rfbA-1 )                  |
| XNG1784 | 7  | hypothetical protein                                                |
| XNG1785 | 7  | comEA-related protein                                               |
| XNG1788 | 5  | 16S ribosomal RNA sequence                                          |
| XNG1820 | 7  | conserved hypothetical protein                                      |
| XNG1855 | 12 | hypothetical protein                                                |
| XNG1856 | 12 | hypothetical protein                                                |
| XNG1868 | 13 | methionine aminopeptidase ( map )                                   |
| XNG1872 | 13 | conserved hypothetical protein                                      |
| XNG1888 | 9  | hypothetical protein                                                |
| XNG1895 | 10 | amino acid ABC transporter, permease protein                        |
| XNG1896 | 7  | amino acid ABC transporter, integral membrane protein               |
| XNG1897 | 7  | amino acid ABC transporter, ATP-binding protein                     |
| XNG1898 | 12 | amino acid transporter, periplasmic solute-binding protein          |
| XNG1904 | 5  | glycerol-3-phosphate dehydrogenase (NAD <sup>+</sup> ) ( gpsA )     |
| XNG1909 | 4  | 30S ribosomal protein S9 ( rpsI )                                   |
| XNG1910 | 8  | hypothetical protein                                                |
| XNG1948 | 11 | Opa protein                                                         |
| XNG1968 | 12 | lipopolysaccharide glycosyl transferase, ( lgtG )                   |
| XNG1983 | 13 | hypothetical protein                                                |
| XNG1993 | 1  | hypothetical protein                                                |
| XNG2005 | 6  | conserved hypothetical protein                                      |
| XNG2007 | 13 | hypothetical protein                                                |
| XNG2014 | 13 | hypothetical protein                                                |
| XNG2045 | 13 | lacto-N-neotetraose biosynthesis glycosyl transferase LgtA ( lgtA ) |
| XNG2047 | 13 | galactose alpha 1-4 transferase LgtC ( lgtC )                       |
| XNG2048 | 13 | GalNAc transferase to lacto-N-neotetraose LgtD ( lgtD )             |
| XNG2052 | 13 | conserved hypothetical protein                                      |
| XNG2059 | 13 | hypothetical protein                                                |
| NMC0006 | 13 | putative glycerate dehydrogenase                                    |
| NMC0026 | 3  | hypothetical protein                                                |

|          |    |                                                                                  |
|----------|----|----------------------------------------------------------------------------------|
| NMC0209  | 6  | hypothetical protein                                                             |
| NMC0282  | 3  | hypothetical protein                                                             |
| NMC0295  | 9  | putative methylase                                                               |
| NMC0296B | 9  | hypothetical transposase interrupted gene                                        |
| NMC0298  | 9  | hypothetical protein                                                             |
| NMC0300  | 7  | hypothetical protein                                                             |
| NMC0393  | 10 | hypothetical protein                                                             |
| NMC0399B | 5  | hypothetical protein                                                             |
| NMC0487  | 13 | putative pilin                                                                   |
| NMC0590  | 13 | hypothetical protein                                                             |
| NMC0778  | 11 | hypothetical protein                                                             |
| NMC0874  | 7  | hypothetical protein                                                             |
| NMC0887  | 1  | hypothetical protein                                                             |
| NMC0968  | 1  | hypothetical protein                                                             |
| NMC1051  | 9  | hypothetical protein                                                             |
| NMC1107  | 9  | bacterioferritin B ( bfrB )                                                      |
| NMC1120a | 7  | hypothetical protein                                                             |
| NMC1127  | 3  | hypothetical protein                                                             |
| NMC1195  | 12 | peptidyl-prolyl cis-trans isomerase (ppiA)                                       |
| NMC1225  | 13 | hypothetical protein                                                             |
| NMC1402  | 7  | hypothetical protein                                                             |
| NMC1413  | 13 | putative glutamate dehydrogenase                                                 |
| NMC1519  | 10 | hypothetical protein                                                             |
| NMC1520  | 9  | hypothetical protein                                                             |
| NMC1690  | 7  | transferrin-binding protein A ( tbpA )                                           |
| NMC1691  | 9  | transferrin-binding protein B ( tbpB )                                           |
| NMC1704  | 13 | DNA repair protein RecO ( recO )                                                 |
| NMC1795  | 13 | hypothetical protein                                                             |
| NMC1812  | 8  | putative ABC transporter, ATP-binding protein ( )                                |
| NMC1881  | 9  | hypothetical protein                                                             |
| NMC2020  | 12 | major outer membrane protein PorB ( porB )                                       |
| NMC2022  | 13 | hypothetical protein                                                             |
| NMC2036  | 7  | putative transcriptional activator protein MetR ( metR )                         |
| NMC2141  | 13 | glutamyl-tRNA synthetase ( gltX )                                                |
| GB CDS   | 10 | Type IV pilin class II (pilE) (U81551)                                           |
| GB CDS   | 13 | truncated protein disrupted by IS element (AJ278708)                             |
| GB CDS   | 4  | haloacid dehalogenase-like hydrolase, putative (AF320320)                        |
| GB CDS   | 12 | pilin glycosylation protein PglB2 (AF320320)                                     |
| GB CDS   | 2  | putative methylase (AJ238948)                                                    |
| GB CDS   | 13 | exl3L (AF319537)                                                                 |
| GB CDS   | 13 | MNgoNXV (AJ004687)                                                               |
| GB CDS   | 1  | plasmid repressor protein (AF126482)                                             |
| MME CDS  | 13 | CDS1 from MMEfrr in <i>N. lactamica</i> (DQ115758)                               |
| MME CDS  | 13 | CDS2 from MMEfrr in <i>N. lactamica</i> (DQ115758)                               |
| MME CDS  | 13 | CDS from MMEnrdAB in <i>N. lactamica</i> (DQ115765)                              |
| MME CDS  | 13 | ORF1a from MMEpheST in <i>N. polysaccharea</i> (AF542178)                        |
| MME CDS  | 13 | ORF4 from MMEpheST in <i>N. lactamica</i> (AF542177)                             |
| MME CDS  | 12 | ORF1 from MMEpheST in <i>N. lactamica</i> (AF542177)                             |
| MME CDS  | 12 | CDS2 from MMEuvrB in <i>N. meningitidis</i> strain 00/240794 (DQ115766)          |
| MME CDS  | 11 | CDS from MMEhesA in <i>N. polysaccharea</i> (DQ115773)                           |
| NG5043   | 7  | yea from <i>N. gonorrhoeae</i> strain MS11 Gonococcal Genetic Island (AY803022)  |
| NG5020   | 6  | traN from <i>N. gonorrhoeae</i> strain MS11 Gonococcal Genetic Island (AY803022) |
| NG5006   | 6  | traA from <i>N. gonorrhoeae</i> strain MS11 Gonococcal Genetic Island (AY803022) |
| NG5053   | 1  | topB from <i>N. gonorrhoeae</i> strain MS11 Gonococcal Genetic Island (AY803022) |
| cassette | 3  | ampicillin resistance gene                                                       |
| cassette | 3  | erythromycin resistance gene                                                     |
| 16S_BIG  | 13 | 16S ribosomal RNA sequence                                                       |
| 16S_MID  | 13 | 16S ribosomal RNA sequence                                                       |
| 16S_SM   | 13 | 16S ribosomal RNA sequence                                                       |

|         |    |                            |
|---------|----|----------------------------|
| 23S_BIG | 13 | 23S ribosomal RNA sequence |
| 23S_MID | 13 | 23S ribosomal RNA sequence |
| 23S_SM  | 13 | 23S ribosomal RNA sequence |

<sup>a</sup>**Gene:** Indicates the gene probe that is hybridized by one or more of the *N. lactamica* strains tested. Genes are first identified by their locus annotation numbers from *N. meningitidis* serogroup B strain MC58<sup>9</sup>. When the gene probe is not present in the genome sequence of *N. meningitidis* serogroup B strain MC58, then the gene locus identifiers are from, in order, the *N. meningitidis* serogroup A strain Z2491 annotation<sup>10</sup>, our *N. gonorrhoeae* strain FA1090 annotation (<http://www.compbio.ox.ac.uk/data>), *Neisseria* spp. sequences from GenBank/EMBL (Accession numbers listed in annotation column), sequences identified from Minimal Mobile Elements (Accession numbers listed in annotation column), sequences from the *N. gonorrhoeae* strain MS11 Gonococcal Genetic Island (AY803022), sequences from antibiotic resistance cassettes, and sequences from the rRNA loci.

<sup>b</sup>**Present:** Indicates the number of *N. lactamica* strains, out of 13 strains tested, which had strong hybridization signal for the indicated gene. Strong signal was determined by a pON value of > 0.67, as determined by BlueFuse for Microarrays (BlueGnome).

<sup>c</sup>**Annotation:** Derived from the published annotations and our own annotation of *N. gonorrhoeae* strain FA1090 and other sequences. This annotation of *N. gonorrhoeae* is displayed in the supporting FA1090 GBrowse database (<http://www.compbio.ox.ac.uk/data>).
